# Supplementary material for: The effect of combining antibiotics on resistance: A systematic review and meta-analysis
Source: bioRxiv or medRxiv preprint supplement (doi:10.1101/2023.07.10.23292374), 2024-06-28
Supplement: Supplementary file [file media-1.pdf]

1 **Supporting Information for**  
2 **The effect of combining antibiotics on resistance: A systematic**  
3 **review and meta-analysis**

4  
5 Berit Siedentop<sup>1,2\*</sup>, Viacheslav N. Kachalov<sup>2,3</sup>, Christopher Witzany<sup>1</sup>, Matthias Egger<sup>4,5,6</sup>, Roger D.  
6 Kouyos<sup>2,3†</sup>, Sebastian Bonhoeffer<sup>1†</sup>

7 <sup>1</sup> Institute of Integrative Biology, Department of Environmental Systems Science, ETH Zürich,  
8 Zurich, Switzerland

9 <sup>2</sup> Division of Infectious Diseases and Hospital Epidemiology, University Hospital Zürich, University  
10 of Zürich, Zürich, Switzerland

11 <sup>3</sup> Institute of Medical Virology, University of Zurich, Zurich, Switzerland

12 <sup>4</sup> Institute of Social and Preventive Medicine (ISPM), University of Bern, Bern, Switzerland

13 <sup>5</sup> Population Health Sciences, University of Bristol, Bristol, UK

14 <sup>6</sup> Centre for Infectious Disease Epidemiology and Research, Faculty of Health Sciences,  
15 University of Cape Town, Cape Town, South Africa

16 †These authors contributed equally

17 \*Berit Siedentop, Sebastian Bonhoeffer

18

19

20

21

22

23

24

25

26

27

## 28 **Supporting Information Text**

### 29 **1. Definitions of resistance development**

30 To measure resistance development in patients with standard clinical routines is  
31 challenging. Without antibiotic pressure a resistant strain might be present within the patient at  
32 low frequency and might not be detected with a culture due to detection limits. With antibiotic  
33 treatment the frequency of this resistant strain might rise and therefore the strain might be  
34 detected in a follow-up culture. In this case resistance did not develop *de novo*, but it is difficult to  
35 distinguish this case from an event where it did. Furthermore, the genetic relatedness is not  
36 always checked between initial and follow-up cultures, meaning that the resistant bacterium at a  
37 follow-up culture could have been also transmitted from a different body site or from other  
38 infection sources. To give a more comprehensive overview of how antibiotic treatment strategies  
39 might affect the resistance development, we therefore choose to present the results of two  
40 resistance estimates. A broader estimate, acquisition of resistance, and a stricter estimate *de*  
41 *nov* emergence of resistance, where the latter is a subset of the former. A patient is considered  
42 to have acquired resistance, if at the follow-up culture there has been a resistant (as defined by  
43 the study authors) bacterial species detected, that has not been detected in the baseline culture.  
44 A patient is considered to have *de novo* emergence of resistance, if at follow-up up culture a  
45 resistant bacterium was detected, that has already been detected at the baseline culture, but  
46 sensitive. *De novo* emergence of resistance is nested in the definition of acquisition of resistance.  
47 In acquisition of resistance we account for bacteria at low abundance that could have been  
48 already present at the beginning of treatment, but not detected at screening. In this definition it is  
49 impossible to distinguish though, whether the bacteria already colonised the patient or whether  
50 the patient was newly infected by an external source during treatment and when the bacterium  
51 developed resistance. We also included the stricter definition *de novo* emergence of resistance.  
52 For *de novo* emergence we only consider cases where a sensitive bacterium was cultured at  
53 baseline. In this definition it is less likely to count cases, where resistant bacteria were transmitted  
54 from an external source, as a *de novo* emergence event. But there are cases, which are counted  
55 as an event of *de novo* emergence of resistance, where in fact resistance did not develop newly,  
56 but resistance was only selected during treatment. This could be the case when a sensitive  
57 bacterium was cultured at baseline and the same kind of bacterium was also present at a non-  
58 detectable frequency as a resistant phenotype. Overall both resistance development definitions  
59 have their limitations and capture slightly different impacts of antibiotic treatment on resistance.

60 In the main manuscript we showed results for the outcome acquisition of resistance and in  
61 the following section the main pooled estimates for *de novo* emergence of resistance are  
62 presented.

### 63 **2. Main estimates for *de novo* emergence of resistance**

64 As for acquisition of resistance (main text figure 3), we did not identify a difference of using a  
65 higher number of antibiotics in comparison to less if *de novo* emergence of resistance is  
66 considered.

67 Counterintuitively, for *Mycobacterium tuberculosis* (Mtb) – which may be regarded as the flagship  
68 of antibiotic combination therapy – we could only identify two studies matching our inclusion  
69 criteria via our systematic search (main text figure 3, figure S1). Since the 1950s the  
70 administration of antibiotics often changes within the Mtb treatment period (1, 2). With the early  
71 establishment of changing antibiotics within the Mtb treatment period, it would be understandable,  
72 that resistance development measurements of periods with fixed antibiotic treatment, which is an  
73 inclusion criterion for our review, got less frequent over the years. Therefore, the relatively small  
74 proportion of Mtb studies included in our review is not surprising.  
75

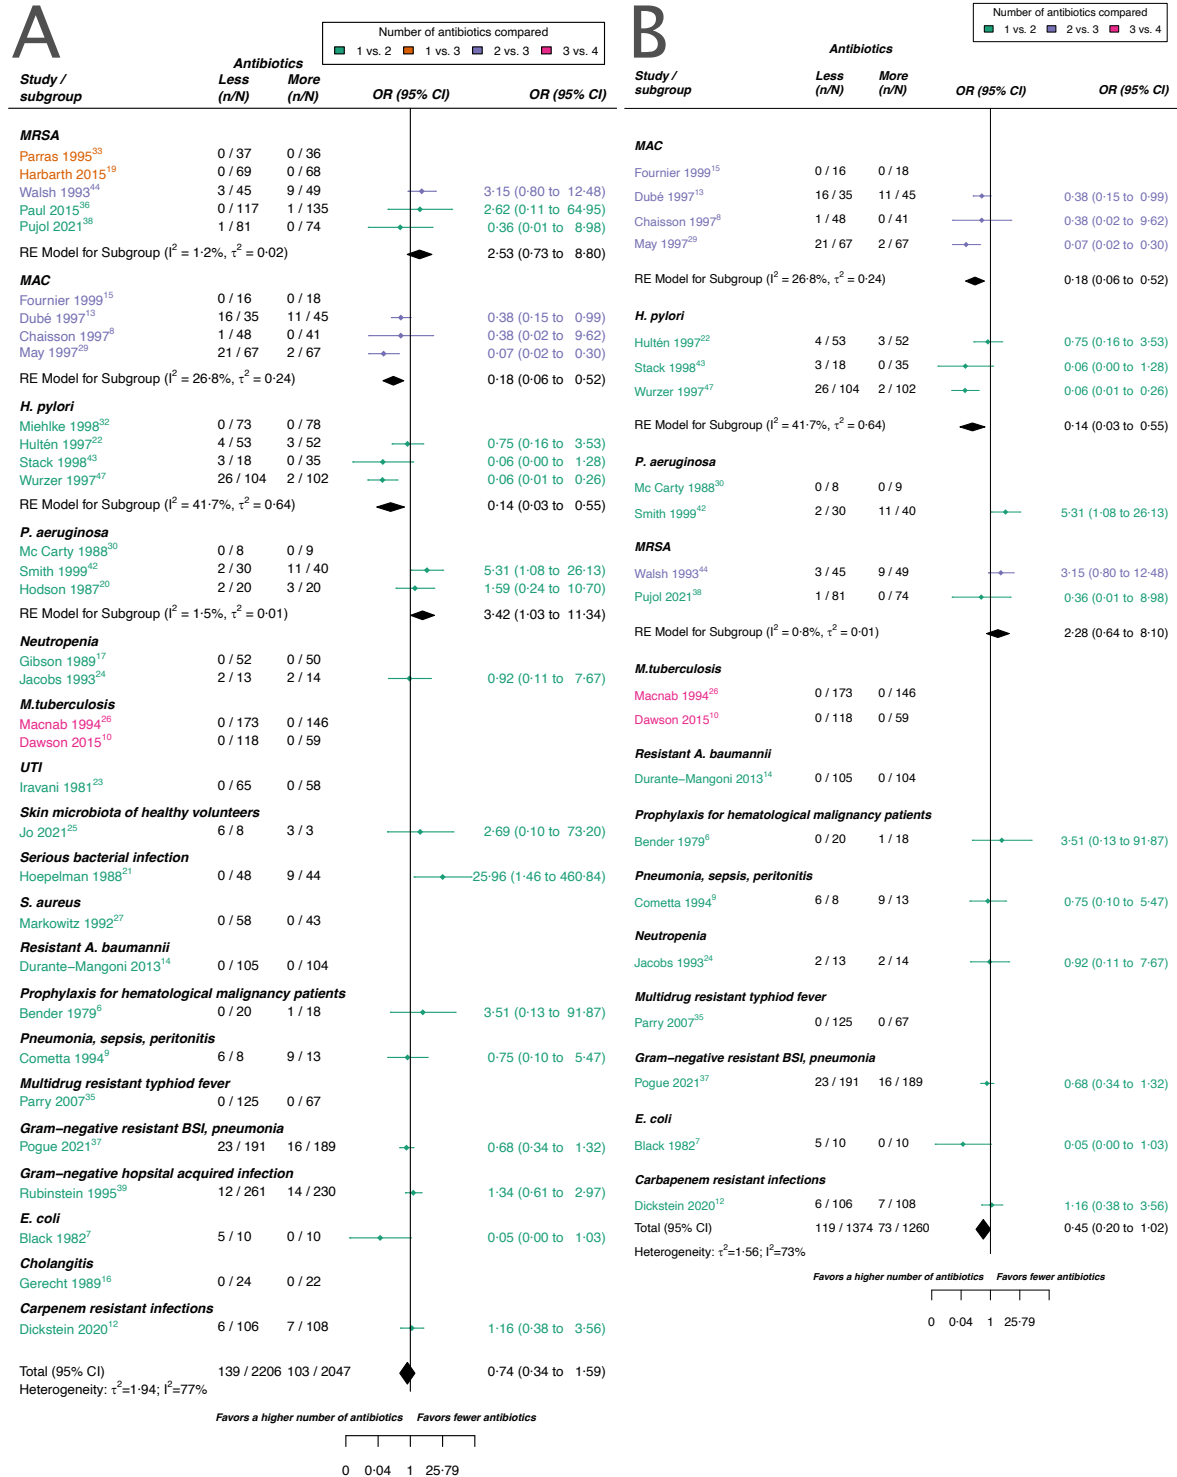

76  
77  
78  
79  
80  
81  
82  
83

**Fig. S1.** Forest plot of *de novo* emergence of bacterial resistance stratified by the reason antibiotics were administered. The coloring indicates the number of antibiotics that were compared in each study. A) The overall pooled LOR of all included studies. B) The pooled LOR of studies with at least one antibiotic in common in the treatment arms. MRSA stands for methicillin-resistant *Staphylococcus aureus*, MAC for *Mycobacterium avium* complex, and BSI for blood stream infection.

84 **2.1. All studies**

85 For all studies meeting our inclusion criteria and reporting data of *de novo* emergence of  
86 resistance our estimate did not suggest a difference between using a higher number of antibiotics  
87 in comparison to less. This result was in line with our main outcome acquisition of resistance.  
88 Nevertheless, for *de novo* emergence of resistance there was a slight trend observable which  
89 suggested a benefit of using a higher number of antibiotics. However, we could not identify a  
90 clear benefit (pooled OR 0.74, 95% CI 0.34 – 1.59, figure S1 A). This trend might be due to the  
91 stricter definition of *de novo* emergence relative to acquisition of resistance. In the definition of  
92 acquisition of resistance bacterial species that are different from the initial identified infecting  
93 organism are included, whereas for *de novo* emergence of resistance they are not necessarily  
94 included. For *de novo* emergence of resistance, the efficacy of antibiotic treatment against the  
95 considered bacteria is therefore expected to be higher as for acquisition of resistance, as  
96 antibiotics typically have a specific bacterial spectrum of activity. The model including all studies  
97 reporting *de novo* emergence of resistance showed a substantial amount of heterogeneity  
98 ( $I^2=77%$ , figure S1A).

99 **2.2. Studies with at least one antibiotic common to both treatment arms**

100 To compare more similar antibiotic treatments, we also estimated the effect of *de novo*  
101 emergence of resistance based on studies, that had at least one antibiotic common to the  
102 comparator arms. With this restriction we also did not identify a difference of using a higher  
103 number of antibiotics in comparison to less, but we observed a stronger tendency of a benefit of  
104 using a higher number of antibiotics (pooled OR 0.45, 95% CI 0.20 – 1.02, figure S1B). The  
105 model for studies reporting *de novo* emergence of resistance, and with at least one common  
106 antibiotic in the comparator arms showed still a substantial amount of heterogeneity ( $I^2=73%$ ,  
107 figure S1B).

108 **3. Risk of bias assessment**

109 To assess the risk of bias for our two main outcomes we used the RoB 2 tool (3). The results of  
110 the risk of bias assessments for acquisition, and *de novo* emergence of resistance differed only  
111 marginally, which can be explained by the overlap of those two definitions. We defined *de novo*  
112 emergence of resistance as a stricter subset of acquisition of resistance (section 1). In both cases  
113 two studies were classified overall with a low risk of bias, and about 50 % percent of the studies  
114 were classified overall with some concerns of bias (67% acquisition of resistance, 72 %  
115 emergence of resistance, figure S2). The highest source of at least some concern was the  
116 selection of the reported results. As development of resistance is not a typical main objective of  
117 RCTs, and since we included a large proportion of rather old studies, the resistance outcome is  
118 often not well (pre-)defined (table S1) and not presented in a systematic way, which can explain  
119 the risk of bias observed in the category “selection of the reported results”. Since the studies were  
120 rather underpowered (main text: figure 2B) to detect the resistance development, missing data  
121 was commonly a high risk of concern in the domain “deviations from intended interventions”. The  
122 detailed output of the risk of bias assessment using the RoB 2 tool can be found at OSF under  
123 the following link “[https://osf.io/gwefy/?view\\_only=f6a4c1f4c79241038b203bd03c8e1845](https://osf.io/gwefy/?view_only=f6a4c1f4c79241038b203bd03c8e1845)”.

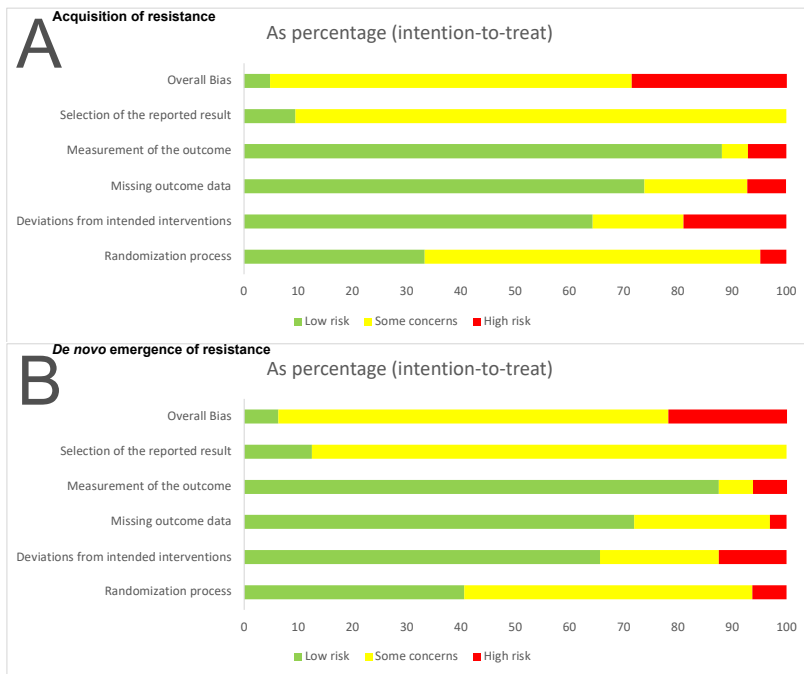

125

126 **Fig. S2.** Risk of bias summary for the two main outcomes: A) Acquisition of resistance, B) *de*  
127 *nov*o emergence of resistance.

128

129 **Table S1.** Justification for extraction of resistance development. The definitions of resistance  
130 development are stated as given by study authors. In case no explicit definition was given, we  
131 state a justification for extraction and indicate it with (\*). Note that for data extraction for the  
132 publications of Dekker et al. 2015 and Pogue et al. 2021 additional publications of the same  
133 studies were consulted (Paul et al. 2018 (4) and Kaye et al. 2022 (5) respectively). Resistance  
134 breakpoints are stated in case numerical values were given in the respective studies. See table 1  
135 in the main text for which antibiotics the studies tested and reported extractable resistance data.

| Study                       | Definition of resistance development given by study authors or justification for extraction                                                                                                                                                                                                                                                                                                                                                                        |
|-----------------------------|--------------------------------------------------------------------------------------------------------------------------------------------------------------------------------------------------------------------------------------------------------------------------------------------------------------------------------------------------------------------------------------------------------------------------------------------------------------------|
| Bender et al. (1979)(6)     | Susceptibility testing for gentamicin of the flora was performed at randomisation and twice weekly after with Kirby-Bauer disk technique and microtiter minimal inhibitory concentration. (*)                                                                                                                                                                                                                                                                      |
| Black et al. (1982)(7)      | Patients were infected with a known strain and all stool cultures and rectal swabs were plated and tested for trimethoprim resistance. (*)                                                                                                                                                                                                                                                                                                                         |
| Chaisson et al. (1997)(8)   | Testing of isolates for susceptibility for clarithromycin, ethambutol, and clofazimine was performed before the entry of study and monthly for 6 months in broth by the method of Heifets.(*)                                                                                                                                                                                                                                                                      |
| Cometta et al. (1994)(9)    | All microorganisms were sensitive to imipenem at randomisation and follow-up cultures were performed. (*)                                                                                                                                                                                                                                                                                                                                                          |
| Dawson et al. (2015)(10)    | Susceptibility testing at randomisation and for the following cultures by rapid testing. Susceptibilities to isoniazid, rifampicin, and fluoroquinolones were determined by line probe assay. (*)                                                                                                                                                                                                                                                                  |
| Dekker et al. (1987)(11)    | At admission cultures were performed and surveillance culture were done twice a week. Gram negative bacilli were tested for antibiotic susceptibility. The minimal inhibitory concentrations were assessed by agar dilution technique. An MIC of $\geq 2 \mu\text{g/mL}$ was considered resistant for ciprofloxacin, an MIC of $\geq 4 \mu\text{g/mL}$ for trimethoprim and an MIC $\geq 75 \mu\text{g/mL}$ for sulfamethoxazole. (*)                              |
| Dickstein et al. (2019)(12) | Development of a new colistin-resistant (CoIR) isolate within 28 days from study enrolment. To be considered a new CoIR isolate, the CoIR isolate had to be detected on Day seven or later in patients for whom the baseline isolate was colistin-susceptible, and for whom no CoIR isolate was cultured from the rectal swab taken on Day one. Susceptibility was determined by broth microdilution. Colistin resistance was defined as an MIC $> 2\text{mg/L}$ . |

|                                   |                                                                                                                                                                                                                                                                                                                                                                                                                                                                                                                                                                                                                                                                                                                                                                                                        |
|-----------------------------------|--------------------------------------------------------------------------------------------------------------------------------------------------------------------------------------------------------------------------------------------------------------------------------------------------------------------------------------------------------------------------------------------------------------------------------------------------------------------------------------------------------------------------------------------------------------------------------------------------------------------------------------------------------------------------------------------------------------------------------------------------------------------------------------------------------|
| Dubé et al. (1997)(13)            | All available isolates were tested for susceptibility to clarithromycin. Patients were evaluated at the time of enrolment, two and four weeks later, and then every four weeks. Clarithromycin resistance was defined as detectable growth in a concentration of clarithromycin of 8 µg/mL. (*)                                                                                                                                                                                                                                                                                                                                                                                                                                                                                                        |
| Durante-Mangoni et al. (2013)(14) | The identification of a colistin resistant <i>Acinetobacter baumannii</i> during treatment was defined as resistance emergence. Resistance was determined by microdilution method and/or E-test.                                                                                                                                                                                                                                                                                                                                                                                                                                                                                                                                                                                                       |
| Fournier et al. (1999)(15)        | Susceptibility testing was performed at study entry and after 2 months and classification was performed according to Heifets. (*)                                                                                                                                                                                                                                                                                                                                                                                                                                                                                                                                                                                                                                                                      |
| Gerecht et al. (1989)(16)         | Emergence of resistance was defined as one cause of treatment failure. Emergence of resistance was classified as the detection of an infecting microorganism resistant to more than 4 µg/mL of gentamicin sulfate or more than 128 µg/mL of mezlocillin sodium during treatment while the patient shows indications of cholangitis.                                                                                                                                                                                                                                                                                                                                                                                                                                                                    |
| Gibson et al. (1989)(17)          | Microbiological assessment of the blood was performed before treatment and 96 hours after treatment. (*)                                                                                                                                                                                                                                                                                                                                                                                                                                                                                                                                                                                                                                                                                               |
| Haase et al. (1984)(18)           | Susceptibility was assessed before therapy, during therapy and after therapy. Susceptibility testing was performed with disk dilution method, and agar dilution method. Resistance results were reported for reinfections defined as the reappearance of infection with a different organism after completion of therapy. Resistance against norfloxacin and trimethoprim-sulfamethoxazole was defined as a larger inhibition zone diameter of 0.17 and 0.16 mm, respectively, or/and a MIC larger than 16 µg/mL and 3.4-64 µg/mL, respectively. (*)                                                                                                                                                                                                                                                   |
| Hartbarth et al. (2015)(19)       | Susceptibility assessment was performed at baseline and at the end of treatment. Susceptibility was performed with a disc diffusion method phenotypically and genotypically. (*)                                                                                                                                                                                                                                                                                                                                                                                                                                                                                                                                                                                                                       |
| Hodson (1987)(20)                 | <i>P. aeruginosa</i> had to be sensitive at inclusion and resistance was measured and reported after 10 days of treatment. Sensitivity was determined by standard disc methods. (*)                                                                                                                                                                                                                                                                                                                                                                                                                                                                                                                                                                                                                    |
| Hoepelman et al. (1988)(21)       | Susceptibility was assessed before, during, and after treatment. Susceptibility testing was performed with disc diffusion method and minimum inhibitor concentrations were assessed for blood cultures and patients with no response to treatment with agar dilution technique. Resistance for the agar dilution technique was defined as an MIC of ≥ 32 µg/mL for ceftriaxone, ≥ 8 µg/mL for gentamicin and ≥32 µg/mL for cefuroxime. For the disc diffusion method 30 µg ceftriaxone, 40 µg gentamicin and 60 µg cefuroxime were used. If the zone of inhibition was ≤18 mm cultures were classified as ceftriaxone resistant and sensitive if the zone was ≥26 mm and intermediate in between. For gentamicin the values were ≤20mm and ≥28mm and for cefuroxime ≤20mm and ≥28mm, respectively. (*) |
| Hultén et al. (1997)(22)          | Susceptibility was assessed by E-test at inclusion and 12 weeks after treatment determination. (*)                                                                                                                                                                                                                                                                                                                                                                                                                                                                                                                                                                                                                                                                                                     |
| Iravani et al. (1981)(23)         | Susceptibility testing at baseline, during treatment and at follow-up. Testing was performed with Bauer's disc diffusion method using 30 µg nalidixic acid, 1.25 µg trimethoprim and 23.75 µg sulfamethoxazole. (*)                                                                                                                                                                                                                                                                                                                                                                                                                                                                                                                                                                                    |
| Jacobs et al. (1993)(24)          | Emergence of resistance was defined as treatment failure with resistance, i.e., bacteriological failure with the reisolation of original pathogen(s) resistant to the study antibiotic(s) after treatment.                                                                                                                                                                                                                                                                                                                                                                                                                                                                                                                                                                                             |
| Jo et al. (2021)(25)              | Susceptibility testing before treatment and after treatment by culture. (*)                                                                                                                                                                                                                                                                                                                                                                                                                                                                                                                                                                                                                                                                                                                            |
| Macnab et al. (1994)(26)          | Susceptibility testing before treatment and after around 90 doses. (*)                                                                                                                                                                                                                                                                                                                                                                                                                                                                                                                                                                                                                                                                                                                                 |
| Markowitz et al. (1992)(27)       | Susceptibility was assessed by microdilution method before treatment and for the last continuous positive culture during treatment. Furthermore, susceptibility was assessed for relapse isolates and isolates phenotypically different from the initial one. (*)                                                                                                                                                                                                                                                                                                                                                                                                                                                                                                                                      |
| Mavromanolakis et al. (1997)(28)  | Susceptibility was assessed before treatment, after 2 weeks, at the end of treatment, and 2 weeks after treatment by disk diffusion method. (*)                                                                                                                                                                                                                                                                                                                                                                                                                                                                                                                                                                                                                                                        |
| May et al. (1997)(29)             | Susceptibility was assessed at treatment start, after two months, and in case of relapse by the Becton Dickinson method. (*)                                                                                                                                                                                                                                                                                                                                                                                                                                                                                                                                                                                                                                                                           |
| Mc Carty et al. (1988)(30)        | Susceptibility was assessed at admission, every four days during treatment, and within 48 hours after treatment by broth microdilution method using the American Microscan Gram Negative-Panel. (*)                                                                                                                                                                                                                                                                                                                                                                                                                                                                                                                                                                                                    |
| Menon et al. (1986)(31)           | Susceptibility was assessed before therapy, and after one and two weeks after therapy. (*)                                                                                                                                                                                                                                                                                                                                                                                                                                                                                                                                                                                                                                                                                                             |
| Miehlke et al. (1998)(32)         | Susceptibility was assessed before and after treatment by E-test. An MIC of ≤0.125 mg/L was considered clarithromycin sensitive and an MIC of ≥ 2mg/L resistant. An MIC of ≤2 mg/L was considered amoxicillin susceptible and an MIC of ≥ 4 mg/L resistant. (*)                                                                                                                                                                                                                                                                                                                                                                                                                                                                                                                                        |
| Parras et al. (1995)(33)          | Susceptibility was assessed at baseline and at end of therapy by agar dilution method or automated microdilution methods. (*)                                                                                                                                                                                                                                                                                                                                                                                                                                                                                                                                                                                                                                                                          |
| Pary et al. (1977)(34)            | Susceptibility was assessed before, during, after treatment, after two weeks, and after six months after treatment by Bauer's method. (*)                                                                                                                                                                                                                                                                                                                                                                                                                                                                                                                                                                                                                                                              |
| Pary et al. (2007)(35)            | Susceptibility was assessed before therapy and after treatment by E-test, disk diffusion method. Ofloxacin was tested by disk diffusion method with a 5 µg and organisms were declared susceptible with a breakpoint ≤ 2 µg/mL and resistant with a breakpoint ≥8 µg/mL. Azithromycin                                                                                                                                                                                                                                                                                                                                                                                                                                                                                                                  |

|                              |                                                                                                                                                                                                                                                                                                                                                                                                                                                                                                                                                                 |
|------------------------------|-----------------------------------------------------------------------------------------------------------------------------------------------------------------------------------------------------------------------------------------------------------------------------------------------------------------------------------------------------------------------------------------------------------------------------------------------------------------------------------------------------------------------------------------------------------------|
|                              | was also tested with disk diffusion method (15 µg disk), but no clear breakpoint were defined. Instead azithromycin was determined by E-test according to the manufacture's guideline. (*)                                                                                                                                                                                                                                                                                                                                                                      |
| Paul et al. (2015)(36)       | Development of resistance was defined as acquisition of <i>S. aureus</i> resistant to any of the study drugs or vancomycin resistant <i>Enterococci</i> .                                                                                                                                                                                                                                                                                                                                                                                                       |
| Pogue et al. (2021)(37)      | Number of patients, who developed colistin resistance during therapy. Resistance was assessed with broth microdilution and declared as colistin resistant with an MIC ≥4 mg/L.                                                                                                                                                                                                                                                                                                                                                                                  |
| Pujol et al. (2021)(38)      | Emergence of resistance to study drugs during treatment according to EUCAST.                                                                                                                                                                                                                                                                                                                                                                                                                                                                                    |
| Rubinstein et al. (1995)(39) | Resistance emergence was assessed by measuring MICs before, during and after treatment. Disk diffusion testing was performed with disks of 30 µg ceftazidime, 30 µg ceftriaxone and 10 µg tobramycin. An MIC ≤8 mg/L was considered susceptible for ceftazidime and ceftriaxone and a MIC ≥ 32 mg/L was considered resistant for ceftazidime and an MIC ≥ 64 mg/L for ceftriaxone. An MIC ≤4 mg/L was classified as susceptible for tobramycin, and an MIC ≥ 8 mg/L as resistant.                                                                               |
| Schaeffer et al. (1981)(40)  | Susceptibility was assessed before therapy, after 7 days, and after five to nine days after therapy by plating. Susceptibility testing was performed by plating 0.1mL of culture on MacConkey agar containing 100 µg/mL cinoxacin or 1-24 µg/mL trimethoprim-sulfamethoxazole. Any growing culture was considered resistant and resistance tests were confirmed with standard agar sensitivity testing to a maximum concentration of 100 µg cinoxacin or 80-400 µg trimethoprim-sulfamethoxazole. (*)                                                           |
| Schaeffer et al. (1985)(41)  | Susceptibility testing was performed before therapy, during therapy, and after five to seven days after therapy by plating. 0.1 mL of cultures were plated on either Mueller-Hinton agar containing 10 µg/mL agar of norfloxacin or 1-24 µg/mL agar trimethoprim-sulfamethoxazole with 5 % lysed red blood cells from the horse. Any growing culture was considered resistant and resistance tests were confirmed with tube dilution sensitivity testing to a maximum concentration of 100 µg/mL norfloxacin or 32-608 µg/mL trimethoprim-sulfamethoxazole. (*) |
| Smith et al. (1999)(42)      | Susceptibility was assessed at inclusion, at end of treatment by disk-susceptibility testing. An MIC of ≥100 µg/mL was considered resistant for azlocillin and resistant to tobramycin if the MIC was ≥8 µg/mL. (*)                                                                                                                                                                                                                                                                                                                                             |
| Stack et al. (1998)(43)      | Susceptibility was assessed at baseline, and at four or eight weeks after treatment by E-test. Resistance was considered with bacterial growth at a drug concentration of >2 µg/mL for clarithromycin. (*)                                                                                                                                                                                                                                                                                                                                                      |
| Walsh et al. (1993)(44)      | Susceptibility was assessed at baseline and for organisms culturable after the end of therapy and a two-week follow-up period by a microtiter tube dilution technique. Organisms were declared resistant if the MIC was greater than 2 µg/mL for rifampicin, greater than 8 µg/mL for novobiocin, and greater than 2 µg/mL and 38 µg/mL for trimethoprim and sulfamethoxazole.                                                                                                                                                                                  |
| Winston et al. (1986)(45)    | Susceptibility of surveillance cultures was assessed at baseline, twice weekly during the study period and after study completion. Acquired organisms were defined as new organisms isolated during the study period, that were not present at baseline. An MIC ≤ 16 µg/mL was considered as sensitive for norfloxacin, polymyxin. For disc sensitivity testing cultures were considered sensitive to norfloxacin if a zone of ≥17 mm was present in a 10 µg norfloxacin disk. (*)                                                                              |
| Winston et al. (1990)(46)    | New organisms that were isolated during the study period but have not been present before the study were defined as acquired organisms. Susceptibility tests were done by agar dilution method, or by antibiotic disks. An MIC of ≤ 4, 16, or 4 µg/mL for ofloxacin, polymyxin, or vancomycin was considered susceptible to the antibiotics, respectively. For ofloxacin additional disk sensitivity testing was performed. Susceptibility was declared if a zone of 16mm or greater was present around a 5- µg disk of ofloxacin. (*)                          |
| Wurzer et al. (1997)(47)     | Susceptibility was assessed pre-treatment and between 4 and 6 weeks of follow-up by agar dilution, and microbroth dilution. An MIC concentration of ≤ 2 µg/mL indicated susceptibility for clarithromycin, and an MIC above 2 µg/mL resistance. A MIC lower or equal to 0.125 µg/mL for amoxicillin was considered susceptible and classified resistant if above 0.125 µg/mL. (*)                                                                                                                                                                               |

136

137

#### 4. Sensitivity analysis for main estimates

138

To test the robustness of our main analyses, we performed sensitivity analyses based on the model choice and the risk of bias.

139

##### 4.1. Model choice

140

141

For our analyses we applied the random effects model 4 described in Jackson et al (48) using the R package *metafor* (49). To test the robustness of our estimates to the model choice we reran the main analyses with the conventional random effects model (model 1 in Jackson et al (48)) and an corresponding Bayesian version of model 4 in Jackson et al (48). For the sensitivity analyses the R packages *metafor* (49), and *MetaStan*(50) with default settings were used. We observe that our estimates are typically robust to model choice (figures S3, S4). Only for *P. aeruginosa* our

142

143

144

145

146

147  
148  
149

estimate was not robust in our sensitivity analysis, where the alternative two approaches showed no harm or benefit of using a higher number of antibiotics (figure S3).

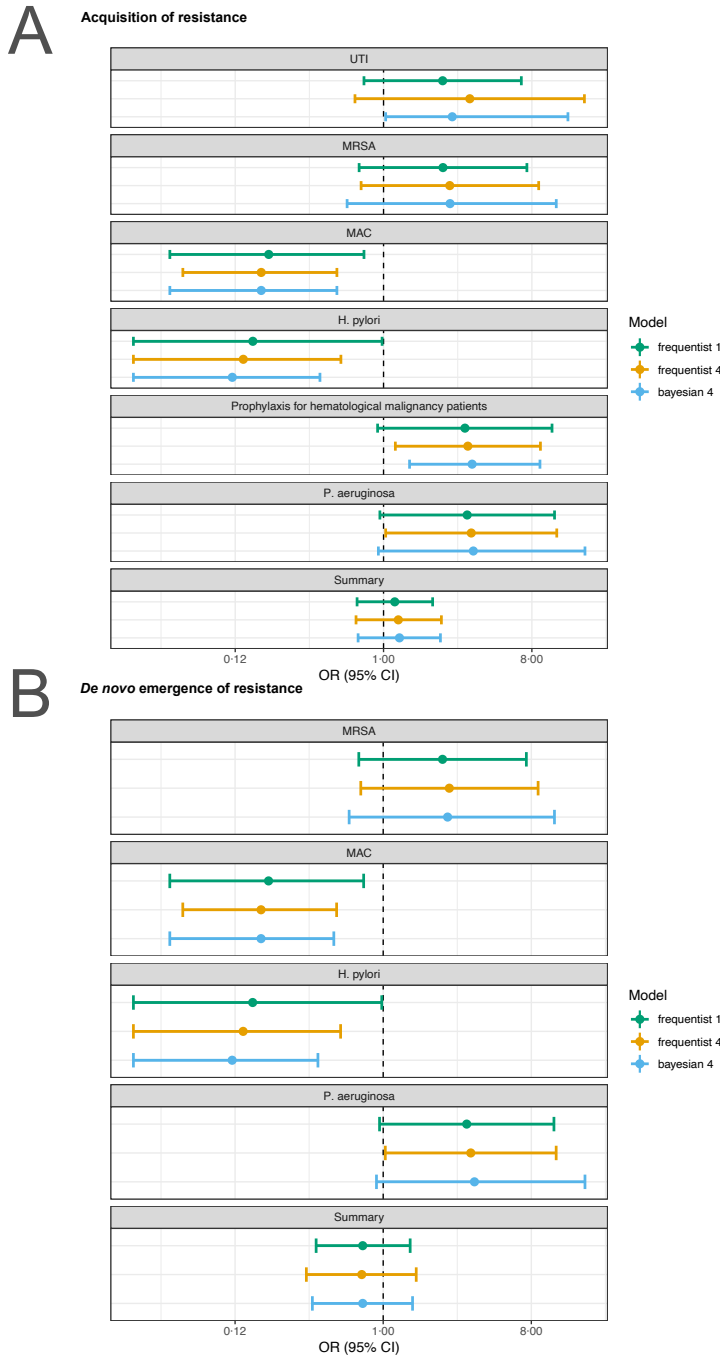

150

151 **Fig. S3.** Sensitivity analysis based on model choice for the two main outcomes: A) acquisition of  
152 resistance, B) *de novo* emergence of resistance. Shown are the frequentist model estimates of  
153 model 1, and model 4 presented in Jackson et al (48) and a Bayesian estimate of model 4. UTI  
154 stands for urinary tract infection, MRSA for methicillin-resistant *Staphylococcus aureus*, and MAC  
155 for *Mycobacterium avium* complex.  
156



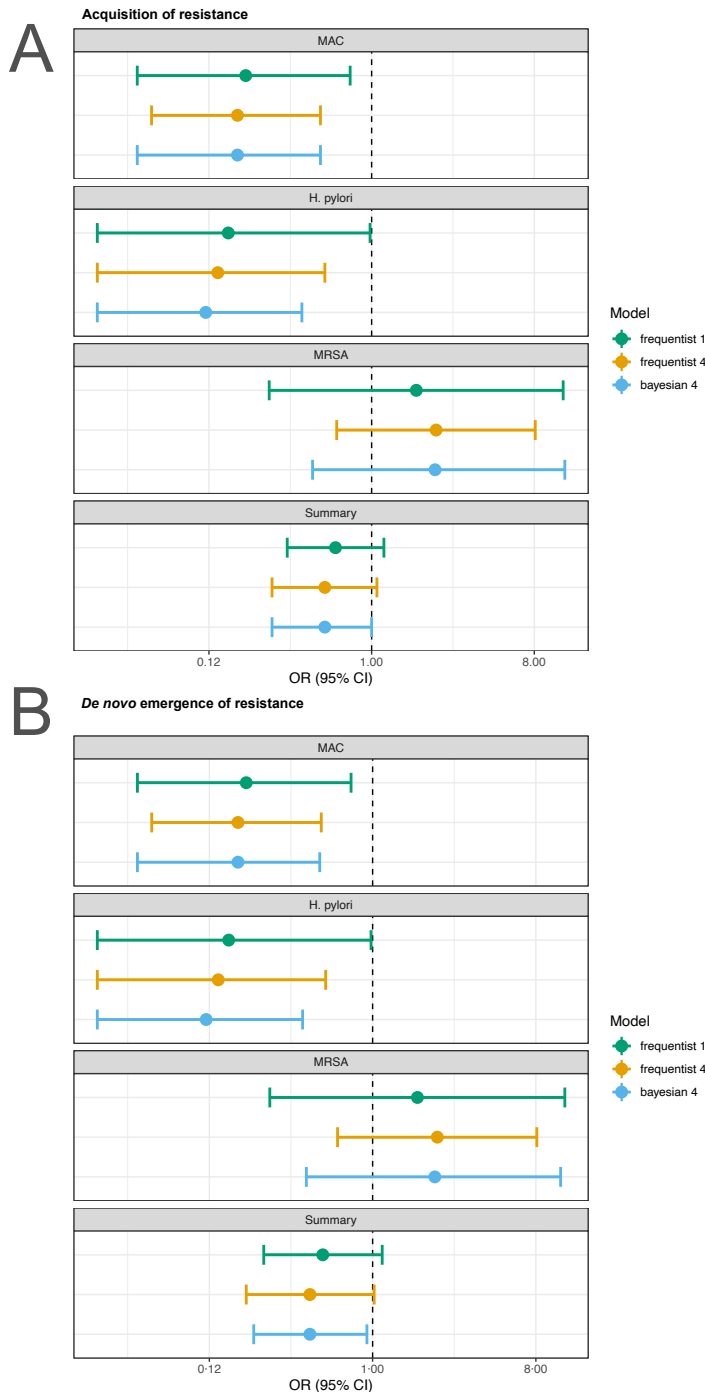

157

158 **Fig. S4.** Sensitivity analysis based on model choice for the two main outcomes restricted to  
 159 studies with at least one common antibiotic in the comparator arms: A) acquisition of resistance,  
 160 B) *de novo* emergence of resistance. Shown are the frequentist model estimates of model 1, and  
 161 model 4 presented in Jackson et al (48) and a Bayesian estimate of model 4.

162

#### 163 **4.2. Impact of risk of bias**

164 To assess the impact of risk of bias on our estimates, we reran the main analyses stratifying  
 165 according to the overall risk of bias. For studies classified with an overall high risk of bias our  
 166 analysis shows that for acquisition of resistance using a lower number of antibiotics shows a

167 benefit (pooled OR 4.45, 95% CI 1.67 – 11.81;  $I^2=57$ , table S2). We did not observe any  
 168 difference of using a higher number of antibiotics in comparison to less in resistance development  
 169 when grouping the rest of the studies according to their risk assessment (table S2). Nevertheless,  
 170 with less risk of bias administering a higher number of antibiotics seemed to perform better in  
 171 comparison to less. However, no clear benefit could be determined (table S2). This observation  
 172 additionally supports that RCTs with resistance development as a main objective, and therefore  
 173 potentially decreasing the risk of bias, are needed to understand the impact of different treatment  
 174 strategies on antibiotic resistance outcomes.  
 175

176 **Table S2.** Summary of the results of the sub-group analyses stratifying according to the overall  
 177 risk of bias for the two main outcomes. Note that the listing of eligible studies also includes  
 178 studies reporting zero cases in both treatment arms and were therefore not included in the  
 179 statistical analysis.

| Overall risk of bias | Outcome                                | OR (95% CI)       | Study heterogeneity ( $I^2$ ; $\tau^2$ ) | Eligible studies                                                                     |
|----------------------|----------------------------------------|-------------------|------------------------------------------|--------------------------------------------------------------------------------------|
| Some concerns        | Acquisition of resistance              | 0.71 (0.38-1.32)  | 72%; 1.15                                | (6, 7, 9-13, 15, 16, 19, 20, 22, 23, 25, 27-35, 39, 41, 43, 44, 47)                  |
| Some concerns        | <i>De novo</i> emergence of resistance | 0.49 (0.21-1.14)  | 73%; 1.53                                | (6, 7, 9, 10, 12, 13, 15, 16, 19, 20, 22, 23, 25, 27, 29, 30, 32-34, 39, 43, 44, 47) |
| High                 | Acquisition of resistance              | 4.45 (1.67-11.81) | 57%; 1.11                                | (8, 17, 18, 21, 24, 26, 36, 37, 40, 42, 45, 46)                                      |
| High                 | <i>De novo</i> emergence of resistance | 2.32 (0.65-8.28)  | 60%; 1.28                                | (8, 17, 18, 21, 24, 26, 36, 37, 42)                                                  |

180

## 181 5. Publication bias

182 In the study protocol we stated that we will test for publication bias via visual inspection of the  
 183 funnel plots and by Egger's test. As Egger's test can have problems with false-positive results for  
 184 dichotomous outcomes, we used a modified version of the Egger's test, i.e. the Harbord's test  
 185 (51).

186 Neither the visual inspection of the funnel plots (figure S5), nor Harbord's tests gave an indication  
 187 for a publication bias for our two main outcomes acquisition, and *de novo* emergence of  
 188 resistance (acquisition of resistance: Harbord's:  $p = 0.28$ ; *de novo* emergence of resistance:  
 189 Harbord's:  $p = 0.51$ ).  
 190

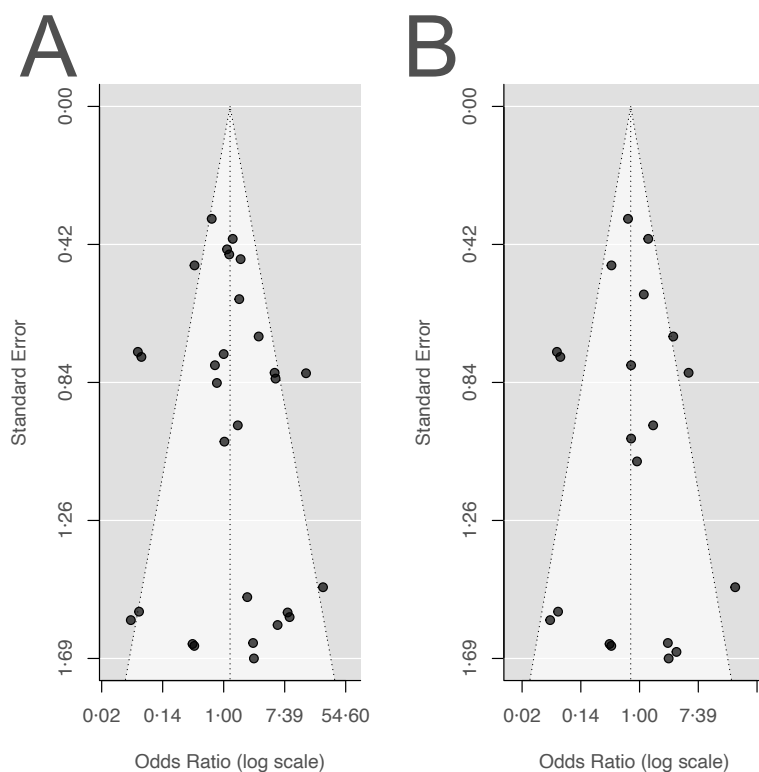

191

192 **Fig. S5.** Funnel plots for the two main outcomes: A) acquisition of resistance, B) *de novo*  
 193 emergence of resistance.

194

195 **6. Sub-group analyses**

196 The performance of an antibiotic treatment strategy to minimise resistance spread is not only  
 197 dependent on the number of antibiotics administered. In our main estimates we found a  
 198 substantial amount of heterogeneity (main text: figure 3; figure S1), which is an indication that  
 199 additional factors might be important to consider in a statistical model. In the following we first  
 200 present the results of in the study protocol pre-defined subgroup analyses and afterwards  
 201 additional post-hoc subgroup analyses. One must consider that the results are mainly based on  
 202 underpowered studies (main text: figure 2 B), and that in the subgroup analyses the number of  
 203 included studies decreases. Therefore, the results of the subgroup analyses should be  
 204 considered with care.

205 **6.1. Predefined in study protocol**

206 The results of our subgroup-analyses for the outcome acquisition of resistance and *de novo*  
 207 emergence of resistance are summarised in table S3 and table S4 respectively. The rationale for  
 208 carrying out the predefined sub-group analyses are explained in the following subsections.  
 209

210 **Table S3.** Summary of the results of the predefined sub-group analyses for the outcome  
 211 acquisition of resistance. Note that the listing of eligible studies also includes studies reporting  
 212 zero cases in both treatment arms, which are not included in the statistical analysis.

| Sub-group Analysis                  | OR (95% CI) | Study heterogeneity ( $I^2$ ; $\tau^2$ ) | Eligible studies |
|-------------------------------------|-------------|------------------------------------------|------------------|
| Number of antibiotics administered: |             |                                          |                  |

|                                                                                   |                   |           |                                                                             |
|-----------------------------------------------------------------------------------|-------------------|-----------|-----------------------------------------------------------------------------|
| 1 vs. 2                                                                           | 1.49 (0.77-2.88)  | 76%; 1.70 | (6, 7, 9, 12, 14, 16-18, 20-25, 27, 28, 30-32, 34-43, 45-47)                |
| 2 vs. 3                                                                           | 0.38 (0.08-1.78)  | 74%; 1.63 | (8, 13, 15, 29, 44)                                                         |
| <b>Administration of additional non-antibiotic drugs:</b>                         |                   |           |                                                                             |
| Non-antibiotic drugs as part of treatment                                         | 0.88 (0.21-3.66)  | 82%; 3.00 | (6, 11, 22, 32, 33, 43, 45-47)                                              |
| Non-antibiotic drugs administered if necessary                                    | 1.07 (0.48-2.40)  | 1%; 0.01  | (12, 14, 23, 24, 38)                                                        |
| <b>Usage of same dosage of antibiotics common to both treatment arms</b>          | 0.59 (0.30-1.18)  | 73%; 1.20 | (6, 8, 9, 12-15, 22, 24, 29, 30, 34, 37, 38, 42-44, 47)                     |
| <b>Required comorbidity at study inclusion:</b>                                   |                   |           |                                                                             |
| Yes                                                                               | 1.23 (0.50-3.01)  | 72%; 1.59 | (6, 8, 11, 13, 15, 17, 20, 24, 27, 29, 30, 34, 42, 45, 46)                  |
| No                                                                                | 1.25 (0.55-2.86)  | 80%; 2.02 | (7, 9, 10, 12, 14, 16, 18, 19, 21-23, 25, 26, 28, 31-33, 35-41, 43, 44, 47) |
| <b>Gram-status</b>                                                                |                   |           |                                                                             |
| Negative                                                                          | 1.14 (0.56-2.35)  | 78%; 1.57 | (7, 11, 12, 14, 20, 22, 23, 25, 28, 30-32, 34, 35, 37, 39, 41-43, 45-47)    |
| Positive                                                                          | 0.44 (0.11-1.76)  | 66%; 1.54 | (8, 13, 15, 19, 27, 29, 33, 36, 38, 44)                                     |
| Negative and positive                                                             | 3.38 (1.08-10.58) | 44%; 0.75 | (6, 9, 16-18, 21, 24, 40)                                                   |
| <b>Only resistances of antibiotics common to treatment arms</b>                   | 0.39 (0.18-0.81)  | 75%; 1.49 | (6-10, 12-15, 22, 24, 26, 29-31, 34, 35, 37, 38, 42-44, 47)                 |
| <b>Age of antibiotics since conduction of the trial:</b>                          |                   |           |                                                                             |
| Youngest antibiotic is in the treatment arm with the lower number of antibiotics  | 1.63 (0.66-4.03)  | 76%; 2.17 | (7, 10, 11, 13, 16-22, 24, 30, 31, 33, 38, 41-43, 45, 46)                   |
| Youngest antibiotic is in the treatment arm with the higher number of antibiotics | 1.08 (0.49-2.42)  | 66%; 0.91 | (8, 12, 14, 15, 23, 25, 27-29, 32, 34-37, 39, 40, 44)                       |
| <b>No antibiotics common to treatment arms</b>                                    | 4.73 (2.14-10.42) | 37%; 0.51 | (11, 16-21, 23, 25, 27, 28, 32, 33, 36, 39-41, 45, 46)                      |

213

214

215

216

217

**Table S4.** Summary of the results of the predefined sub-group analyses for the outcome *de novo* emergence of resistance. Note that the listing of eligible studies also includes studies reporting zero cases of resistance in both treatment arms, which were therefore not included in the statistical analysis.

| Sub-group analysis                                                       | OR (95% CI)      | Study heterogeneity ( $I^2$ ; $\tau^2$ ) | Eligible studies                                                    |
|--------------------------------------------------------------------------|------------------|------------------------------------------|---------------------------------------------------------------------|
| <b>Number of antibiotics administered:</b>                               |                  |                                          |                                                                     |
| 1 vs. 2                                                                  | 0.89 (0.38-2.11) | 75%; 1.90                                | (6, 7, 9, 12, 14, 16, 17, 20-25, 27, 30, 32, 34, 36-39, 42, 43, 47) |
| 2 vs. 3                                                                  | 0.38 (0.08-1.78) | 74%; 1.63                                | (8, 13, 15, 29, 44)                                                 |
| <b>Administration of additional non-antibiotic drugs:</b>                |                  |                                          |                                                                     |
| Non-antibiotic drugs as part of treatment                                | 0.22 (0.04-1.10) | 82%; 1.10                                | (6, 22, 32, 33, 43, 47)                                             |
| Non-antibiotic drugs administered if necessary                           | 0.97 (0.36-2.58) | 1%; 0.01                                 | (12, 14, 23, 24, 38)                                                |
| <b>Usage of same dosage of antibiotics common to both treatment arms</b> | 0.53 (0.24-1.16) | 71%; 1.38                                | (6, 8, 9, 12-15, 22, 24, 29, 30, 34, 37, 38, 42-44, 47)             |
| <b>Required comorbidity at study inclusion:</b>                          |                  |                                          |                                                                     |
| Yes                                                                      | 0.71 (0.21-2.41) | 67%; 1.57                                | (6-10, 12-15, 22, 24, 26, 29, 30, 34, 37, 38, 42-44, 47)            |
| No                                                                       | 0.75 (0.28-2.01) | 80%; 2.02                                | (16, 17, 19-21, 23, 25, 27, 32, 33, 36, 39)                         |

|                                                                                   |                   |           |                                                             |
|-----------------------------------------------------------------------------------|-------------------|-----------|-------------------------------------------------------------|
| <b>Gram status</b>                                                                |                   |           |                                                             |
| Negative                                                                          | 0.60 (0.23-1.55)  | 78%; 1.59 | (7, 12, 14, 20, 22, 23, 25, 30, 32, 34, 37, 39, 42, 43, 47) |
| Positive                                                                          | 0.44 (0.11-1.76)  | 66%; 1.54 | (8, 13, 15, 19, 27, 29, 33, 36, 38, 44)                     |
| Negative and positive                                                             | 3.34 (0.59-18.97) | 47%; 1.39 | (6, 9, 16, 17, 21, 24)                                      |
| <b>Only resistances of antibiotics common to treatment arms</b>                   | 0.32 (0.16-0.66)  | 59%; 0.87 | (6-10, 12-15, 22, 24, 26, 29, 30, 34, 37, 38, 42-44, 47)    |
| <b>Age of antibiotics since conduction of the trial:</b>                          |                   |           |                                                             |
| Youngest antibiotic is in the treatment arm with the lower number of antibiotics  | 0.73 (0.19-2.77)  | 75%; 2.83 | (7, 10, 13, 16, 17, 19-22, 24, 30, 33, 38, 42, 43)          |
| Youngest antibiotic is in the treatment arm with the higher number of antibiotics | 0.86 (0.34-2.17)  | 70%; 0.98 | (8, 12, 14, 15, 23, 25, 27, 29, 32, 34, 36, 37, 39, 44)     |
| <b>No antibiotics common to treatment arms</b>                                    | 3.54 (0.91-13.75) | 38%; 0.68 | (16, 17, 19-21, 23, 25, 27, 32, 33, 36, 39)                 |

218

219

### 6.1.1. Number of antibiotics administered

220

221

222

223

224

225

226

227

228

229

230

231

232

233

234

235

In our systematic review we did not predefine a fixed number of antibiotics to compare. We rather aimed to investigate whether there is a general trend of a treatment strategy with a higher number of antibiotics performing better than one with less antibiotics with respect to resistance development. One can imagine though, that the magnitude of this trend might vary depending on the number of antibiotics compared. For example, if resistance against the used antibiotics is likely to be encountered in the population, a comparison of one versus two antibiotics might give different results than two versus three. In the 1960s for Mtb the number of antibiotics was for instance increased to three antibiotics at the initial treatment phase, due to the finding that primary resistance can be encountered for one drug but rarely to two or three antibiotics (2, 52, 53). On one hand, if the number of antibiotics used is rather high in both treatment arms, there might be no difference in resistance development detected as the treatment period might be too short to observe a relevant effect. On the other hand, if the treatment period is rather long, there might also not be an efficient effect detectable when a low number of antibiotics is compared and the timespan between follow-up cultures is long. We considered the effect of treatment length, and length of follow-up on our estimates later in the meta-regression and multi-model inference (section 7).

236

237

238

239

240

241

242

243

244

We identified three studies comparing one versus three antibiotics, but two of them had zero events for both comparator arms. We included two Mtb studies in our review comparing three versus four antibiotics, but both had zero events in the comparator arms. For the estimates one versus two antibiotics and two versus three antibiotics we did not identify a difference of using a higher number of antibiotics in comparison to less, and substantial heterogeneity was observed (tables S3, S4). Nevertheless, for the estimate two versus three antibiotics there was a beneficial trend for using a higher number of antibiotics observable. However, no clear benefit could be determined (tables S3, S4). This might indicate that in general a higher number of antibiotics in treatments is beneficial.

245

### 6.1.2. Administration of additional non-antibiotic drugs

246

247

248

249

250

251

252

253

254

255

256

In our inclusion criteria we allowed the administration of additional non-antibiotic drugs, which potentially could also affect the resistance outcome due to faster cure of patients, or by specifically supporting the activity of antibiotics, as e.g. beta-lactam-inhibitors. To test the effect of the administration of additional non-administered antibiotics, we performed a sub-group analysis based on whether a study administered additional non-antibiotic drugs or not. Notably, in our studies the additional non-antibiotics were always administered in both treatment arms. Considering if additional non-antibiotic drugs were administered or not did not show any harm or benefit on the resistance outcome whether a higher number of antibiotics was used or a lower number (tables S3, S4). A few studies allowed the administration of additional non-antibiotics, but they were not a fixed part of the treatment regime. Also, in those studies we did not identify a harm or benefit (tables S3, S4).

257

### 6.1.3. Usage of same dosage of antibiotics common to both treatment arms

258 Not only the number of total antibiotics might determine the efficacy of a treatment, but also  
259 the dosage of antibiotics. To compare more similar treatments, we estimated the pooled OR for  
260 studies that administered at least one antibiotic common to both treatment arms, and where  
261 additionally the antibiotics that were common were administered with the same dosage. We  
262 observed that in most cases if at least one common antibiotic was administered, their dosage was  
263 the same (78% acquisition of resistance, 86% emergence of resistance). Therefore, it is not  
264 surprising that we observe, in line with the analysis "at least one antibiotic common to both  
265 treatment arms" (main text: figure 3B, figure S1 B), no difference in using a higher number of  
266 antibiotics in comparison to less to reduce resistances (tables S3, S4). In both cases we  
267 observed a substantial amount of heterogeneity, which indicates that further factors might play a  
268 role for explaining the observed resistance differences.

#### 269 **6.1.4. Required comorbidity at study inclusion**

270 The way the immune-system reacts to an infection might potentially influence the  
271 frequencies of resistances observed (54). Therefore, we tested whether studies that considered  
272 patients with a comorbidity, assuming that the immune system is to some extent compromised,  
273 show a different trend of resistance development in comparison to studies where no comorbidity  
274 was required for study inclusion. For this analysis we considered studies, that had comorbidities  
275 as a requirement for study entry. We could not identify a difference of using a higher number of  
276 antibiotics in comparison to less for both main outcomes, and regardless of comorbidity status at  
277 study entrance (tables S3, S4).

#### 278 **6.1.5. Study was conducted in an ICU**

279 Another way to test the potential role of the immune system is by severity of illness,  
280 approximated whether the study population was treated within an ICU or not. We were not able to  
281 link on a patient level the data of resistance development to the patient's ICU status. Therefore,  
282 we tried to classify the ICU status per study, i.e. one status for the whole study population. We  
283 only identified two studies (5%) for acquisition of resistance, where the whole study population  
284 was in the ICU. We found 9 studies (21%), where no patient was treated in the ICU. For the rest  
285 of the studies the population could either be mixed (14%), or no information was confidentially  
286 extractable (60%). Since the ICU status on a study level seemed to be an uninformative proxy,  
287 we decided not to perform sub-group analyses for this factor.

#### 288 **6.1.6. Gram-status**

289 The gram status of a bacterium may potentially determine how effective an antibiotic, or an  
290 antibiotic combination is. Differences between gram-negative and gram-positive bacteria such as  
291 distinct bacterial surface organisation can lead to specific intrinsic resistances of gram-negative  
292 and gram-positive bacteria against antibiotics (55). These structural differences can lead to  
293 varying effects of antibiotic combinations between gram-negative and gram-positive bacteria (56).  
294 Additionally, plasmids play a major role in the dissemination of antibiotic resistance genes in both  
295 gram-positive, and negative bacteria (57). The spread of plasmids differs considerably between  
296 gram-positive bacteria and gram-negative bacteria (58). These structural differences could  
297 influence the performance of antibiotic treatment strategies. To test the influence of the gram-  
298 status on our estimates we performed sub-group analyses with studies, that focused only on  
299 measurements of gram-negative bacteria, gram-positive, or both. We classified the gram-status  
300 on a study level as we could not link the gram-status and resistance development on a patient  
301 level.

302 When selecting for studies that either focus on gram-negative, or gram-positive we did not  
303 identify a difference in using a higher number of antibiotics in comparison to less for both main  
304 outcomes (tables S3, S4). For the subgroup analysis including studies with the focus on both  
305 gram-negative and positive bacteria the treatment strategy with a lower number of antibiotics  
306 showed a benefit for the main outcome acquisition of resistance (pooled OR 3.38, 95% CI 1.08 –  
307 10.58;  $I^2=44%$ , table S3). However, for *de novo* emergence of resistance we did not identify a  
308 difference (pooled OR 3.35, 95% CI 0.67 – 16.71;  $I^2=47%$ , table S4) It seems, that acquisition of  
309 resistance is more sensible to the restriction on which gram-status is considered. This might be  
310 due to the broader definition of acquisition of resistance as it is more sensitive to resistance  
311 changes in the microbial community. If a treatment is targeted against a specific pathogen, e.g. a  
312 gram-positive bacterium, other bacteria of the microbiota are exposed to the treatment as well.  
313 Some bacteria of the microbiota might be more intrinsically resistant against the administered

314 antibiotics, e.g. a gram-negative bacterium, and are therefore more likely to develop resistance.  
315 With acquisition of resistance, we might detect such effects.

#### 316 **6.1.7.All resistances not only against administered antibiotics**

317 Antibiotic resistances can be acquired by plasmids, which in a clinical context often confer  
318 resistances against multiple antibiotics (59-61). Therefore, we aimed to test, whether a higher  
319 number of antibiotics also leads to resistance against a higher number of antibiotics, considering  
320 both resistances of antibiotics that were administered and ones that were not. For acquisition of  
321 resistance, we only identified seven studies that measured resistances also against non-  
322 administered drugs. Only three of those studies have non-zero events. For *de novo* emergence of  
323 resistance, we identified four studies measuring resistances against non-administered antibiotics,  
324 were two of them have non-zero events in both treatment arms. Due to the small number of  
325 studies identified and even smaller number of studies having non-zero resistance events, we only  
326 present the estimates of the resistances against non-administered antibiotics (sections 9.6 and  
327 9.7).

#### 328 **6.1.8.Only resistances of antibiotics common to treatments arms**

329 To estimate how the same antibiotics performed in the different treatment arms we  
330 performed a subgroup-analysis only considering resistance against antibiotics common to both  
331 treatment arms. For both main outcomes we observed that if we only consider resistances of  
332 common antibiotics the treatment arm with the higher number of antibiotics showed a benefit  
333 (acquisition of resistance: pooled OR 0.39, 95% CI 0.18 – 0.81;  $I^2=76%$ , table S3; emergence of  
334 resistance: pooled OR 0.32, 95% CI 0.16 – 0.66;  $I^2=59%$  table S4). Consequently, we can  
335 conclude that for a specific antibiotic less resistances will develop in a treatment arm with a  
336 higher number of antibiotics.

337 As the studies included in our meta-analysis often did not quantify the resistance outcome  
338 for all antibiotics administered in a treatment arm it is harder to assess the full resistance burden  
339 of the antibiotic treatments systematically. One could argue that due to the higher number of  
340 antibiotics given in one treatment arm, one would also observe in total a higher resistance burden  
341 in that arm. This possible effect could be magnified dependent on the potency of antibiotics. If a  
342 treatment arm is a combination of a low potency antibiotics, one might expect a higher chance of  
343 resistance. The results of this sub-group analysis highlight once more that a systematic  
344 exploration of resistance development in RCTs is important for a better understanding of  
345 resistance development during treatment and that the identity of the administered antibiotics  
346 might play an important role.

#### 347 **6.1.9.Age of antibiotics since conduction of the trial**

348 The prevalence of antibiotic resistance affects the treatment success. If resistance before  
349 treatment is frequent in the population, then this increases the likelihood that the prescribed  
350 antibiotic treatment fails for any patient. We collected data on the year the admission of patients  
351 for the individual studies started and the year antibiotics became available. With the naive  
352 assumption that the longer the antibiotic has been available before the study was conducted, the  
353 higher is its resistance prevalence within the population. This assumption has its weaknesses as  
354 antibiotics are used with different intensities over the years and their local pattern of use might  
355 vary. However, such data are more difficult to retrieve. Hence, the years an antibiotic was  
356 available until the trial started is a simple first approximation to investigate resistance prevalence.

357 If the studies did not state the year the trial started, we extracted the publication year. For  
358 the availability of antibiotics, we used the older of the two dates available on DrugBank (62) and  
359 DrugCentral (63) (DrugBank: marketing start , DrugCentral: approvals).

360 In the following we present the subgroup analyses, where we classify in which comparator  
361 arm the youngest antibiotic is administered. We did not detect a harm or benefit of using a higher  
362 or lower number of antibiotics when stratifying, and observed in all subgroup analyses at least a  
363 substantial amount of heterogeneity (table S3, table S4).

364 Furthermore, we performed subgroup analyses stratifying according to the mean age of  
365 antibiotics in a treatment arm, and the oldest antibiotic of the treatment arm. For those analyses  
366 we also did not identify a difference of using a higher number of antibiotics over fewer. It could be  
367 that our approximation is too simplified to estimate the potential effect.

#### 368 **6.1.10. No antibiotics common to treatment arms**

369 In the main analyses we presented the estimates for all studies, and studies, which  
 370 administered at least one antibiotic common to the treatment arms. Here in the supplement we  
 371 present the resistance estimates for less comparable treatments, i.e. for studies, whose treatment  
 372 arms had no antibiotics in common. For those studies we observed for both main outcomes a  
 373 trend favouring the treatment arm with fewer antibiotics (acquisition of resistance: pooled OR  
 374 4.73, 95% CI 2.14 – 10.42;  $I^2=37\%$ , table S3; *de novo* emergence of resistance: pooled OR 3.54,  
 375 95% CI 0.91 – 13.75;  $I^2=38\%$ , table S4). The benefit was for acquisition of resistance clear, and  
 376 for *de novo* emergence of resistance not. The result that if the treatment arms had no antibiotics  
 377 in common a lower number of antibiotics performed better than a higher number of antibiotics  
 378 could be due to different potencies of antibiotics or resistance prevalences. Further, there could  
 379 be a bias to combine less potent antibiotics or antibiotics with higher resistance prevalence to  
 380 ensure treatment efficacy, which could lead to higher chances to detect resistances in the  
 381 treatment arm with higher number of antibiotics, e.g. by selecting pre-existing resistance (see  
 382 also section 6.1.9). This highlights once more that the identity of antibiotics may play an important  
 383 role in determining whether combining antibiotics is beneficial or not with respect to resistance  
 384 development.

### 385 6.1.11. Systematic testing of the whole study population

386 In our protocol we predefined that we would perform a sub-group analyses based on  
 387 whether the resistance data were systematically available for the whole study population or just a  
 388 subset of patients. All our included studies attempted to measure resistance data for the whole  
 389 study population. In some cases, more information on resistance development was reported than  
 390 what we could use. In those cases, it was impossible to distinguish how many patients were  
 391 evaluable for the resistance outcomes, and/or how many patients developed resistances. In  
 392 summary, we always obtained data for the whole study population, except of the missing data  
 393 cases, but nevertheless we could not process all information given due to the way it was  
 394 reported. The influence of missing data is assessed in the risk of bias assessment (section 3),  
 395 and the corresponding sensitivity analyses (section 4.2).

## 396 6.2. Post-hoc subgroup analyses

### 397 6.2.1. Additional administration of antibiotics

398 During our selection process of studies, we realised that some studies allowed the addition  
 399 of further antibiotics to the assigned treatments, if necessary, whereas others explicitly stated no  
 400 other antibiotics than the assigned ones are given during the treatment phase. For a large  
 401 proportion of all included studies, we could not extract whether additional antibiotics were allowed  
 402 or not (62%). As we cannot rule out that in those studies no additional antibiotics were  
 403 administered, we decided to include studies where additional antibiotics are allowed. To check  
 404 the impact of this decision we performed a sub-group analyses for those studies, where  
 405 information of administration of additional antibiotics was given. We identified 12 studies, which  
 406 allowed the administration of additional antibiotics, but only at most seven studies could be  
 407 included in the statistical analyses as the other trials reported zero cases in both treatment arms  
 408 (14, 17, 19, 23, 30) (tables S5, S6). We identified three studies explicitly excluding additional  
 409 antibiotics, however the statistical analyses is based on two studies as one reported zero cases in  
 410 both treatment arms (16) (tables S5, S6). Therefore, the impact of allowing the administration of  
 411 additional antibiotics, if necessary, on our overall estimates was difficult to infer.  
 412

413 **Table S5.** Summary of the results of the post-hoc sub-group analyses for the outcome acquisition  
 414 of resistance. Note that the listing of eligible studies also includes studies reporting zero cases in  
 415 both treatment arms and were therefore not included in the statistical analysis.

| Sub-group Analysis                               | OR (95% CI)      | Study heterogeneity ( $I^2$ ; $\tau^2$ ) | Eligible studies                        |
|--------------------------------------------------|------------------|------------------------------------------|-----------------------------------------|
| <b>Additional administration of antibiotics:</b> |                  |                                          |                                         |
| Allowed                                          | 1.18 (0.70-1.97) | 16%; 0.07                                | (12, 14, 17, 19, 23, 24, 30, 36-39, 46) |
| Prohibited                                       | 0.19 (0.04-0.98) | 57%; 0.79                                | (16, 22, 47)                            |
| <b>Pre-resistance against non-administered</b>   |                  |                                          |                                         |



| <b>antibiotics required at study inclusion:</b>        |                  |           |                                                                  |
|--------------------------------------------------------|------------------|-----------|------------------------------------------------------------------|
| Required                                               | 1.08 (0.57-2.05) | 15%; 0.07 | (12, 14, 19, 33, 36-38, 44)                                      |
| No                                                     | 1.25 (0.61-2.55) | 79%; 2.22 | (6-11, 13, 15-18, 20-32, 34, 35, 39-43, 45-47)                   |
| <b>Way of antibiotic administration:</b>               |                  |           |                                                                  |
| Orally                                                 | 1.18 (0.44-3.15) | 78%; 2.70 | (6-8, 10, 13, 18, 22, 23, 25, 26, 28, 31, 32, 35, 40, 41, 43-47) |
| Intravenously                                          | 1.83 (0.67-5.00) | 66%; 0.90 | (12, 14, 16, 17, 21, 24, 27, 37, 38, 42)                         |
| Different ways of administration in the treatment arms | 1.51 (0.67-3.39) | 1%; 0.01  | (11, 20, 34, 36)                                                 |

416

417 **Table S6.** Summary of the results of the post-hoc sub-group analyses for the outcome *de novo*  
418 emergence of resistance. Note that the listing of eligible studies also includes studies reporting  
419 zero cases in both treatment arms and were therefore not included in the statistical analysis.

| <b>Sub-group Analysis</b>                                                               | <b>OR (95% CI)</b> | <b>Study heterogeneity (<math>I^2</math>; <math>\tau^2</math>)</b> | <b>Eligible studies</b>                                  |
|-----------------------------------------------------------------------------------------|--------------------|--------------------------------------------------------------------|----------------------------------------------------------|
| <b>Additional administration of antibiotics:</b>                                        |                    |                                                                    |                                                          |
| Allowed                                                                                 | 0.95 (0.59-1.51)   | 3%; 0.01                                                           | (12, 14, 17, 19, 23, 24, 30, 36-39)                      |
| Prohibited                                                                              | 0.19 (0.04-0.98)   | 57%; 0.79                                                          | (16, 22, 47)                                             |
| <b>Pre-resistance against non-administered antibiotics required at study inclusion:</b> |                    |                                                                    |                                                          |
| Required                                                                                | 1.07 (0.53-2.18)   | 17%; 0.10                                                          | (12, 14, 19, 33, 36-38, 44)                              |
| No                                                                                      | 0.63 (0.23-1.68)   | 78%; 2.57                                                          | (6-10, 13, 15-17, 20-27, 29, 30, 32, 34, 39, 42, 43, 47) |
| <b>Way of antibiotic administration:</b>                                                |                    |                                                                    |                                                          |
| Orally                                                                                  | 0.37 (0.11-1.23)   | 69%; 1.96                                                          | (6-8, 10, 13, 22, 23, 25, 26, 32, 43, 44, 47)            |
| Intravenously                                                                           | 1.82 (0.64-5.18)   | 66%; 0.90                                                          | (12, 14, 16, 17, 21, 24, 27, 37, 38, 42)                 |
| Different ways of administration in the treatment arms                                  | 2.12 (0.35-12.79)  | 1%; 0.01                                                           | (20, 34, 36)                                             |

420

421

422

423

424

425

426

427

428

429

430

431

432

433

434

435

436

437

438

### 6.2.2. Pre-resistance against non-administered antibiotics

Some of the studies we included were focused on the treatment of resistant pathogens. Therefore, we tested whether carriage of resistance against non-administered antibiotics might affect the development of resistance against administered antibiotics. We identified eight studies requiring pre-resistance, of which five had non-zero events in both treatment arms. For both studies requiring pre-resistance and no pre-resistance, we could not identify a trend favouring more or less antibiotics (tables S5, S6). As multi-drug resistance is an increasing concern it is important to understand if the optimal treatment strategy for pre-resistant pathogens might differ from the one of sensitive pathogens. However, the data of our meta-analysis are not sufficient to answer this question.

### 6.2.3. Way of antibiotic administration

The way how antibiotics are administered, e.g. intravenously (IV) or orally, could also impact the development of antibiotic resistance due to different pharmacokinetics and potential differing antibiotic bioavailability (64). Therefore, we stratified our studies according to the way antibiotics were administered: orally, or IV in both treatment arms, or the way of administration differed in the treatment arms. We could not identify a harm or benefit in the sub-group analyses of using a higher or a lower number of antibiotics (tables S5, S6).

439

440

441

## 7. Meta-regressions and multi-model inference

Additionally, to the subgroup analyses we also performed meta-regressions for the exploration of the importance of factors potentially affecting our main outcomes. For the meta-regression

442 models we used the conventional random effects model (model 1 in Jackson et al (48)) due to  
443 convergence issues with model 4 and since our sensitivity analysis of the main outcomes showed  
444 typically robustness to the model choice (section 4). With performing meta-regressions, we were  
445 able to include continuous covariables such as treatment length, and by multi model inference we  
446 could obtain parameter estimates averaged over a set of models. The set of possible models was  
447 restricted to meta-regression models with up to two covariables and no interaction terms to avoid  
448 overfitting. We performed multi-model inference with the R package *MuMIn* (version 1.46) (65).  
449 For the multi-model inference all meta regression models of the set of possible models were  
450 simulated. Following a model selection approach using the Akaike information criterion (AIC)  
451 model, the AIC value for each model was calculated. The AIC is a measure of fit, which is based  
452 on the log-likelihood function, and the number of unknown model parameters. Smaller AIC values  
453 are assigned to better model fits. In addition to the AIC value, we calculated the AIC differences  
454 ( $\Delta$ AIC) between each model and the model with the lowest AIC value. With  $\Delta$ AIC we calculated  
455 the Akaike weights, which can be interpreted as the probability a model is the best of the given  
456 set of models and data. With the full model approach, we then calculated the model averaged  
457 coefficients, which are estimates weighted by the Akaike weights and averaged over the whole  
458 set of possible models (full model average). For the interested reader further, detailed information  
459 can be found in literature about multi-model inference (66-68).  
460 The covariables we considered for the meta-regression included: (i) administration of antibiotics  
461 common to the treatment arms, (ii) required comorbidity status at study inclusion, (iii) the year  
462 difference between the youngest antibiotic in the treatment arm with a lower number of antibiotics  
463 and the youngest in the treatment arm with a higher number of antibiotics, (iv) the treatment  
464 length, (v) the length of study/resistance follow up, (vi) gram status of bacteria with resistance  
465 measurements, and (vii) the number of antibiotics administered.  
466 In some cases, the treatment length of the two treatment arms within a study were of different  
467 length, in those cases we took as the treatment length covariable the average treatment time of  
468 both treatment arms. As the treatment times between treatment arms did not vary a lot, we did  
469 not explore those differences further. Furthermore, we wanted to consider the age of antibiotics  
470 since the conduction of a trial. There are several ways of how to implement this as a covariable.  
471 We decided to take the difference of the youngest antibiotics in both treatment arms, as we  
472 expected that novel antibiotics are more likely to be tested in the treatment arm with lower  
473 antibiotics.  
474 For our multi-model inference, we excluded the variables considering whether a study was  
475 conducted in an ICU, and whether additional drugs were administered as we could not confidently  
476 obtain information regarding those variables for more than half of the studies. Due to a high  
477 correlation between the administration of antibiotics common to the treatment arms and same  
478 dosage (acquisition of resistance: 0.95, *de novo* emergence of resistance: 0.91) we excluded the  
479 variable same dosage from the meta-regressions.  
480 Our multi model inference showed that for acquisition of resistance the most important covariable  
481 to include in a meta-regression model to explain some of the observed heterogeneity was  
482 whether antibiotics common to the treatments were used or not (table S7). This is in line with our  
483 sub-group analysis performed (main text figure 3B). By including the information whether at least  
484 one antibiotic was common to both treatment arms in a meta-regression, we could find a  
485 decrease in the estimated heterogeneity ( $I^2=59$ , no-meta-regression:  $I^2=77$ ), but nevertheless the  
486 heterogeneity remains substantial (table S8). Furthermore, we could confirm once more that a  
487 lower number of antibiotics performs better, if in the treatment arms no common antibiotics are  
488 used (tables S7, S8). For *de novo* emergence of resistance, the multi model inference did not  
489 show any significant covariables (table S9).  
490 Overall, this does not necessarily mean that any of the covariables are not impacting the outcome  
491 of resistance development significantly, but since most studies were underpowered (main text  
492 figure 2 B) there is the possibility that we are missing important signals.  
493

494 **Table S7.** Overview of the model averaged coefficients obtained by the multi-model inference for  
 495 the main outcome acquisition of resistance. Significant model estimates are displayed in a bold  
 496 font.

| Model-averaged coefficients (full-average) | Estimated   | Standard error | z value     | Pr(> z )    |
|--------------------------------------------|-------------|----------------|-------------|-------------|
| Intercept                                  | 0.73        | 1.69           | 0.60        | 0.54        |
| Length of follow-up                        | 1.00        | 1.00           | 0.46        | 0.65        |
| Treatment length                           | 0.99        | 0.01           | 0.77        | 0.43        |
| 1 vs. 3 antibiotics                        | 0.78        | 2.19           | 0.31        | 0.75        |
| 2 vs. 3 antibiotics                        | 1.16        | 2.16           | 0.19        | 0.85        |
| Antibiotics in common: no                  | <b>5.67</b> | <b>1.89</b>    | <b>2.73</b> | <b>0.01</b> |
| Comorbidity: yes                           | 1.35        | 1.77           | 0.53        | 0.60        |
| Gram positive and negative bacteria        | 1.52        | 1.91           | 0.65        | 0.52        |
| Gram positive bacteria                     | 1.08        | 2.07           | 0.11        | 0.91        |
| Year difference of youngest antibiotics    | 1.00        | 1.01           | 0.15        | 0.88        |

497

498 **Table S8.** Model output for a meta-regression for acquisition of resistance including as a  
 499 covariable, whether at least one antibiotic was in common in the treatment arms. Significant  
 500 model estimates are displayed in a bold font.

|                        | OR (95% CI)              | z value     | Pr(> z )        | Study heterogeneity ( $I^2$ ; $\tau^2$ ) |
|------------------------|--------------------------|-------------|-----------------|------------------------------------------|
| Intercept              | 0.63 (0.33-1.21)         | -1.39       | 0.17            | 59%; 0.90                                |
| Antibiotics common: no | <b>5.86 (2.05-16.76)</b> | <b>3.30</b> | <b>&lt;0.01</b> |                                          |

501

502 **Table S9.** Overview of the model averaged coefficients obtained by the multi-model inference for  
 503 the main outcome *de novo* emergence of resistance.

| Model-averaged coefficients (full-average) | Estimated | Standard error | z value | Pr(> z ) |
|--------------------------------------------|-----------|----------------|---------|----------|
| Intercept                                  | 2.22      | 2.42           | 0.90    | 0.37     |
| Length of follow-up                        | 0.99      | 1.01           | 0.73    | 0.46     |
| Treatment length                           | 1.00      | 1.01           | 0.41    | 0.68     |
| 2 vs. 3 antibiotics                        | 1.29      | 2.51           | 0.28    | 0.78     |
| Antibiotics in common: yes                 | 0.32      | 2.66           | 1.16    | 0.25     |
| Comorbidity: yes                           | 1.40      | 2.03           | 0.47    | 0.64     |
| Gram positive and negative bacteria        | 1.45      | 2.23           | 0.47    | 0.64     |
| Gram positive bacteria                     | 1.16      | 1.98           | 0.21    | 0.83     |
| Year difference of youngest antibiotics    | 0.99      | 1.02           | 0.30    | 0.72     |

504

505

## 506 8. Statistical power

### 507 8.1. Adequate treatment arm size

508 Resistance development is a rare event and therefore differences in resistance development are  
 509 difficult to detect in small population sizes. To illustrate this, we calculated how much participants  
 510 would have needed to be included per treatment arm in order to detect whether a higher number  
 511 of antibiotics would half the odds of occurrence of resistance and compared it to the actual  
 512 number of participants (figure S6). For the calculations we assumed a power of 80% and used for

513 each trial the upper confidence interval for the probability of resistance development in the  
 514 treatment arm with the lower number of antibiotics. The confidence interval was determined with  
 515 Bayesian inference.  
 516

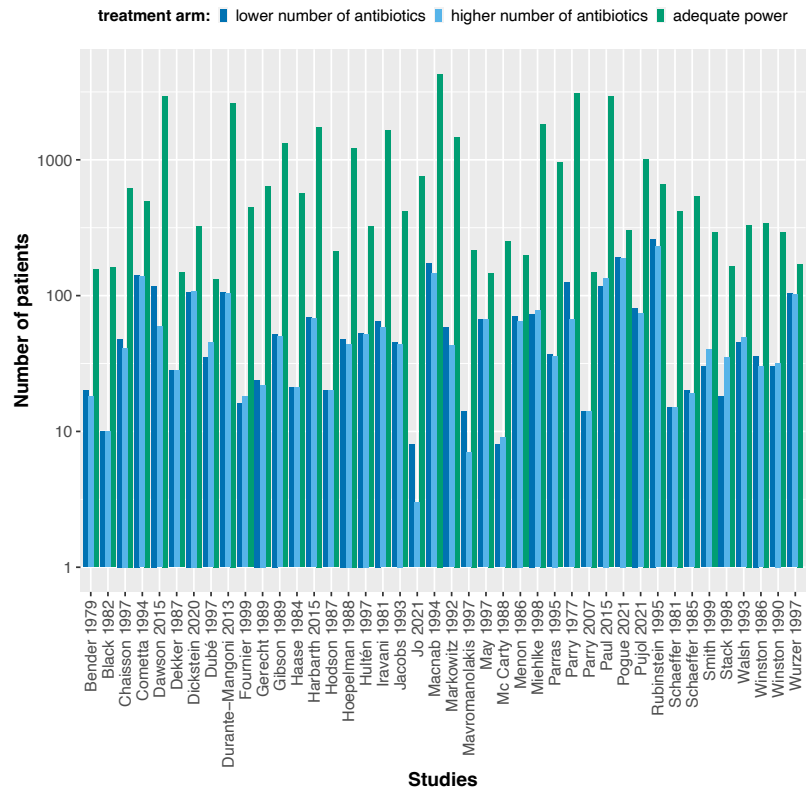

517  
 518 **Fig. S6.** The calculated adequate treatment arm size for each study assuming to detect an odds  
 519 ratio of 0.5 with 80% power in comparison to the actual treatment arm sizes. The power  
 520 calculations were performed using the upper confidence interval for the binomial probability of the  
 521 treatment arm with less antibiotics.

522  
 523  
 524 **8.2. Trial sequential analysis**

525 It is expected that pooling data from several RCTs results in a high level of evidence.  
 526 Nevertheless, meta-analysis might lead to inconclusive results or even misleading ones as meta-  
 527 analyses can also suffer from low statistical power (69). Therefore, we performed for our two  
 528 main outcomes a trial sequential analysis (TSA), using the TSA tool version 0.9.5.10 Beta  
 529 (Copenhagen: The Copenhagen Trial Unit, Centre for Clinical Intervention Research, 2016) to  
 530 assess how strong and sufficient the evidence of our overall analyses is. For both outcomes the  
 531 TSA supports that the existing evidence on resistance development is not sufficient and  
 532 conclusive, as the trial sequential monitoring boundary is not crossed by the Z-curve in any of the  
 533 cases, nor is the required sample size reached (figure S7). For the TSA calculations we used  
 534 resistance incidence rate per treatment arm, which we calculated by averaging the incidence  
 535 rates of all included studies (per outcome). For interested readers technical details of the TSA  
 536 can be found elsewhere (69, 70). The TSA analysis is an additional analysis, which was not  
 537 predefined in our study protocol.  
 538

## A Acquisition of resistance

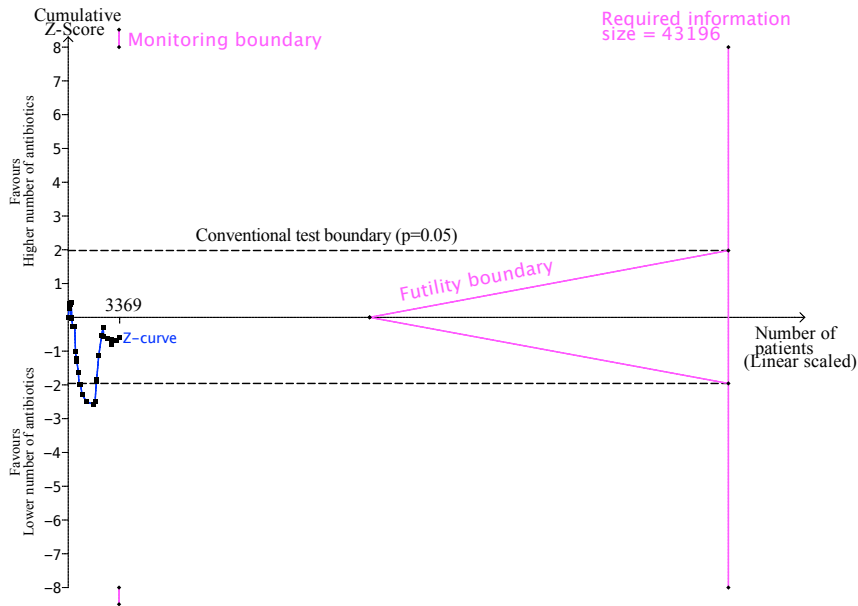

## B Emergence of resistance

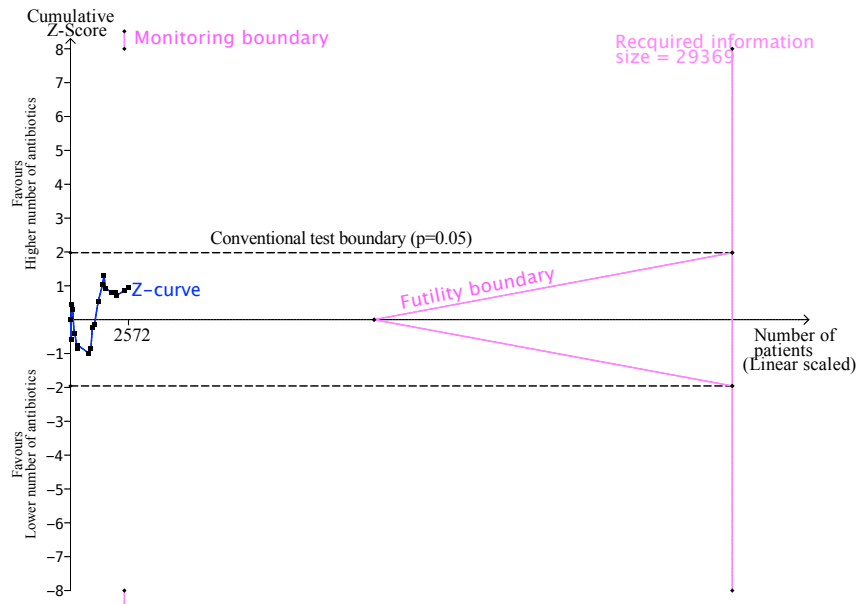

539

540 **Fig. S7.** TSA output using 80% power, and 5% significance to detect a relative odds reduction of  
 541 50%: A) acquisition of resistance. B) *de novo* emergence of resistance. No sufficient evidence on  
 542 development of resistance is supported, since the Z-curves do not cross the monitoring nor the  
 543 futility boundaries, and the required sample size is not reached.

544

545 **9. Secondary Outcomes**

546 In the evaluation of an optimal antibiotic treatment strategy many factors play a role besides the  
547 potential spread of antibiotic resistance and therewith the future potential to treat infections  
548 successfully. One important factor, which is naturally the focus of clinical research, is the  
549 wellbeing of the patient receiving antibiotic treatment. Antibiotic combination therapy is often  
550 associated with a higher medical burden for the treated patient, e.g. through a higher risk of  
551 toxicity (71). To present are more comprehensive evaluation of antibiotic combination therapy, we  
552 systematically summarised the following outcomes as an indication for the wellbeing of the  
553 treated patient: (i) All-cause mortality, (ii) mortality attributable to infection, (iii) treatment failure,  
554 (iv) treatment failure due to a change of resistance against the study drugs, and (v) proportion of  
555 patients with alterations to the treatment due to adverse events. Additionally, we collected data on  
556 acquisition, and *de novo* emergence of resistance against non-administered antibiotics to further  
557 assess the risk of resistance spread, which might affect future treatment success. Overall, we did  
558 not find any indication of a difference for any of these evaluation metrics of combining a higher  
559 number of antibiotics in comparison to less as presented below.

560 **9.1. All-cause mortality**

561 We extracted the number of patients that died in a study as reported. We did not identify a  
562 mortality difference of using a higher number of antibiotics opposed to less (figure S8). One must  
563 consider that the estimated pooled OR 0.98 (95% CI 0.79 – 1.21) was based on several RCTs  
564 with different sources of potential heterogeneity, which we did not account for in our statistical  
565 analysis of secondary outcomes. Nevertheless, the heterogeneity in our random effects model for  
566 all-cause mortality could be classified as unimportant ( $I^2=11\%$ ). In previously conducted meta-  
567 analyses evaluating antibiotic combination therapy mortality was often the main outcome, but the  
568 inclusion criteria were less broad, constrained to specific diseases, pathogens, or particular  
569 antibiotic combinations. The results of those meta-analyses do not easily generalize to one  
570 overall trend, but rather highlight that sub-analyses accounting for specific infections and  
571 antibiotic comparisons might be important as we found for our main outcomes of resistance  
572 development (72-74). Nevertheless, we found in line with most previous meta-analyses no clear  
573 harm or benefit of combining a higher number of antibiotics or less with respect to all-cause  
574 mortality.  
575

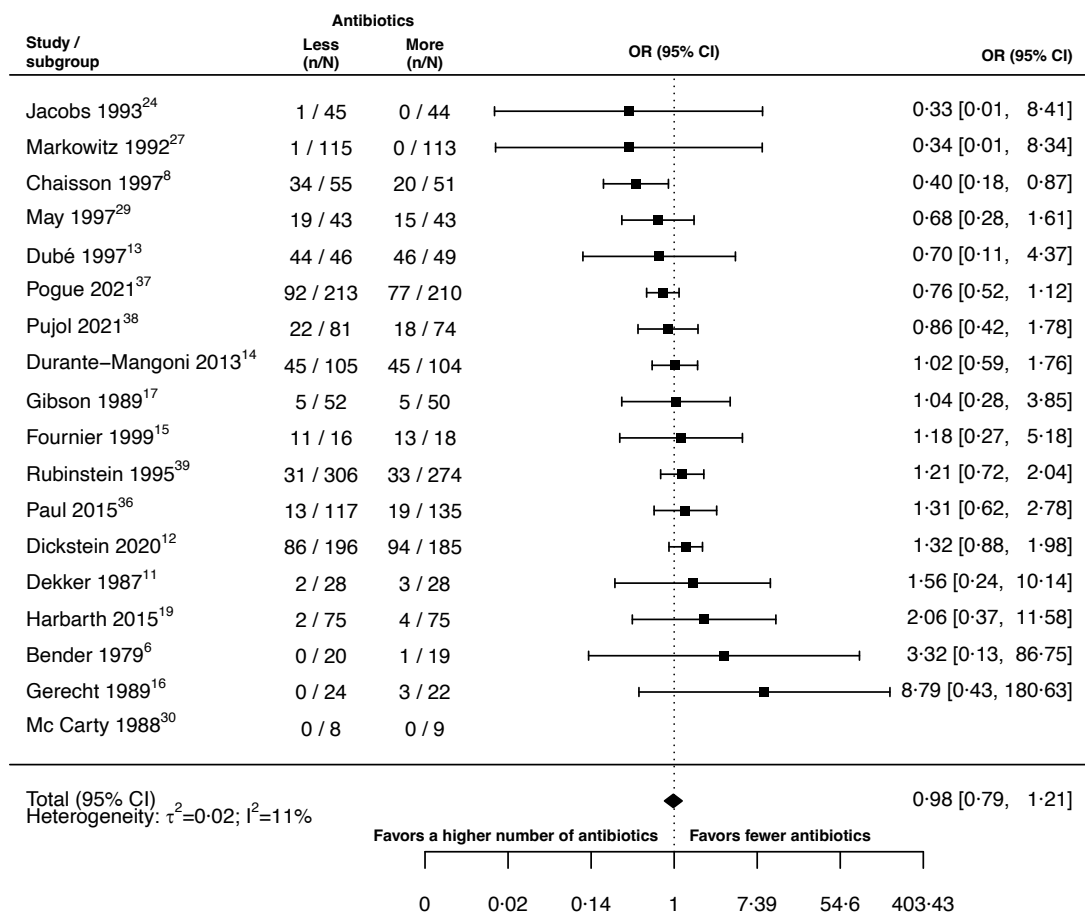

576

577 **Fig. S8.** Forest plot of all-cause mortality.

578

579 **9.2. Mortality attributable to infection**

580 Besides all cause-mortality we also extracted the number of deaths that the respective study  
 581 authors attributed to the infection treated. As for all-cause mortality our estimate for mortality  
 582 attributable to infection indicated no difference between treating with a higher number of  
 583 antibiotics in comparison to less (pooled OR 1.05, 95% CI 0.64 – 1.71; figure S9), and the model  
 584 heterogeneity could also be classified as unimportant ( $I^2=12\%$ ).

585

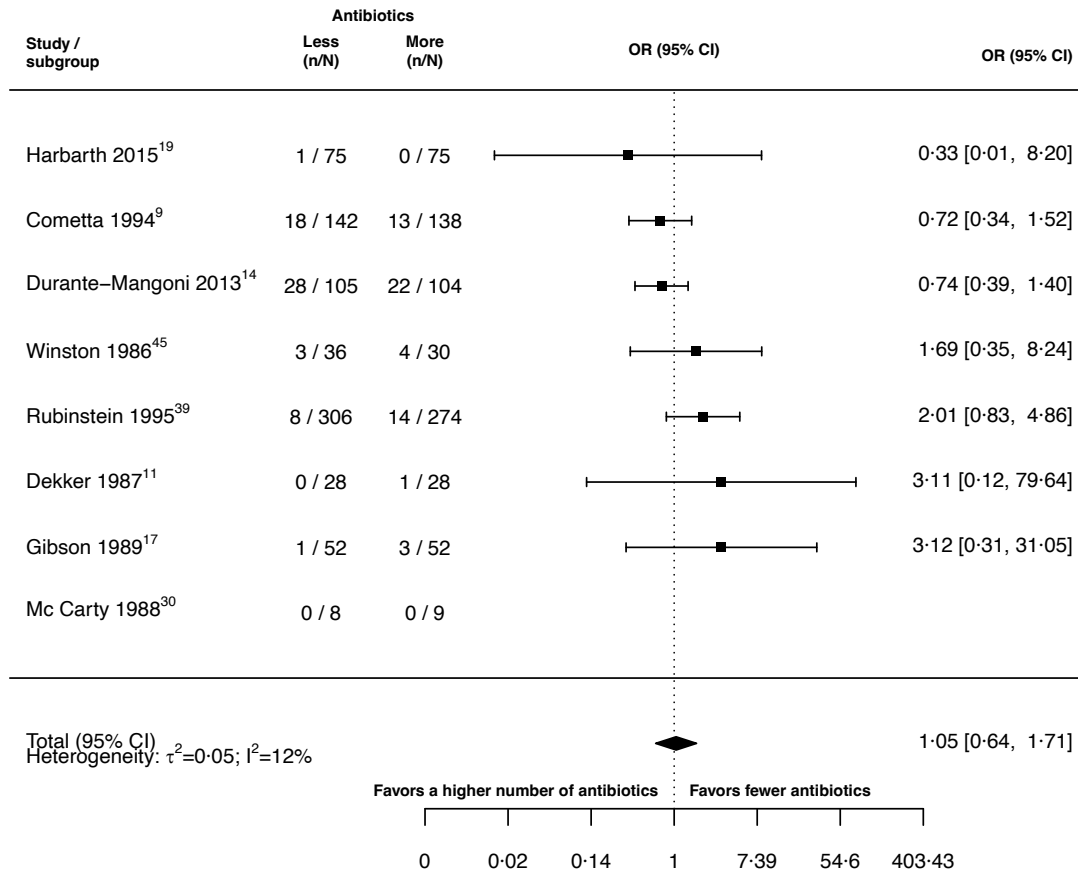

586

587 **Fig. S9.** Forest plot of mortality attributable to infection.

588

589 **9.3. Treatment failure**

590 We extracted the number of treatment failures in each treatment arm if treatment failure was  
 591 explicitly defined or classified by the study authors. As the selection of studies for this meta-  
 592 analysis was not restricted to one specific pathogen, or condition requiring antibiotic treatment,  
 593 we expected a variety of different reasons for the employment of antibiotics. Out of practicality  
 594 and to account for the different conditions treated, we decided not to pre-define our own criteria  
 595 for treatment failure for each condition, but rather use the study's authors interpretation of  
 596 treatment failure (table S10).

597 Our estimate gave no indication for a difference in treatment failure when treating with a higher  
 598 number of antibiotics in comparison with a lower number of antibiotics if treatment failure was  
 599 considered (pooled OR 0.98, 95% CI 0.66 – 1.47; figure S10). However, we observed a  
 600 substantial amount of heterogeneity in our model ( $I^2=74\%$ ), which might indicate that for some  
 601 bacterial conditions or some antibiotic combinations there might be a difference.  
 602



**Table S10.** Overview of different treatment failure definitions.

| Study                             | Definition of treatment failure given by the study authors                                                                                                                                                                                                                                                                                                                                                                                                                                                                                                                                                                                                                                                                                       |
|-----------------------------------|--------------------------------------------------------------------------------------------------------------------------------------------------------------------------------------------------------------------------------------------------------------------------------------------------------------------------------------------------------------------------------------------------------------------------------------------------------------------------------------------------------------------------------------------------------------------------------------------------------------------------------------------------------------------------------------------------------------------------------------------------|
| Cometta et al. (1994)(9)          | Lack of improvement of primary infection, development of a sepsis syndrome or septic shock during treatment, superinfection                                                                                                                                                                                                                                                                                                                                                                                                                                                                                                                                                                                                                      |
| Durante-Mangoni et al. (2013)(14) | No improvement of clinical conditions by day 21 or worsening of the condition at any time, given persistently positive <i>Acinetobacter baumannii</i> cultures                                                                                                                                                                                                                                                                                                                                                                                                                                                                                                                                                                                   |
| Gerecht et al. (1989)(16)         | Continued presence of infecting organism(s) in bile cultures, with persistent indications of cholangitis, or superinfection, or the presence of new infecting organism(s) during or at the end of antibiotic treatment, with indications of cholangitis, or emergence of an infecting organism(s) resistant to gentamicin or mezlocillin during treatment, with indications of cholangitis, or emergence of an infecting organism(s) resistant to gentamicin or mezlocillin during treatment, with indications of cholangitis, or relapse, or recurrence of indications of cholangitis, with the original infecting organism(s) present in cultures of bile or blood within eight weeks after treatment, or death due to uncontrolled infection. |
| Haase et al. (1984)(18)           | The persisting presence of the pretherapy infecting organism, with or without pyuria, during treatment.                                                                                                                                                                                                                                                                                                                                                                                                                                                                                                                                                                                                                                          |
| Hartbarth et al. (2015)(19)       | No improvement or worsening in the clinical condition, or a change of the assigned therapy at any time, or death.                                                                                                                                                                                                                                                                                                                                                                                                                                                                                                                                                                                                                                |
| Jacobs et al. (1993)(24)          | No apparent response to therapy and no definitive identification of an alternative etiology that would explain this lack of response.                                                                                                                                                                                                                                                                                                                                                                                                                                                                                                                                                                                                            |
| Markowitz et al. (1992)(27)       | Persistence of septic pulmonary emboli, persistence of positive blood or deep tissue cultures, or relapse after the end of presumably adequate treatment.                                                                                                                                                                                                                                                                                                                                                                                                                                                                                                                                                                                        |
| May et al. (1997)(29)             | Treatment failure was defined as all other situations than success, whereas the primary determinants of success were as follows: patient living, either not fever or a reduction of $\geq 1$ °C in initial body temperature, and a blood culture negative for <i>M. avium</i>                                                                                                                                                                                                                                                                                                                                                                                                                                                                    |
| Parry et al. (2007)(35)           | Continuing fever with at least one other typhoid-related symptom for more than seven days after the start of treatment, or a required change in therapy due to the development of severe complications during treatment (severe gastrointestinal bleeding, intestinal perforation, visible jaundice, myocarditis, pneumonia, renal failure, shock, or an altered conscious level)                                                                                                                                                                                                                                                                                                                                                                |
| Paul et al. (2015)(36)            | Treatment failure at seven days was defined as a composition of death, persistence of fever, persistence of hypotension, non-improving Sequential Organ Failure Assessment score, or persistent bacteraemia on day seven.                                                                                                                                                                                                                                                                                                                                                                                                                                                                                                                        |
| Pogue et al. (2021)(37)           | Clinical failure was defined by meeting any of the following criteria: death either during therapy or within 7 days after; receipt of rescue therapy for the trial pathogen within 7 days after treatment, exclusion from the trial due to an adverse event considered related to trial treatment; bacteremia more than 5 days after the begin of therapy for patients with blood stream infections; or failure to improve or worsening of oxygenation by the end of trial treatment in patients with pneumonia.                                                                                                                                                                                                                                 |
| Pujol et al. (2021)(38)           | No clinical improvement after 3 days of therapy, persistent MRSA bacteraemia at day 7 or later, early discontinuation of therapy due to adverse events or based on clinical judgment, recurrent MRSA bacteraemia before or at test of cure, missing blood cultures at test of cure, and/or death due to any cause before test of cure.                                                                                                                                                                                                                                                                                                                                                                                                           |
| Rubinstein et al. (1995)(39)      | Use of a new antibiotic due to a worsening in clinical condition, isolation of resistant organism, or                                                                                                                                                                                                                                                                                                                                                                                                                                                                                                                                                                                                                                            |

superinfection at the initial site during treatment, no clinical response or death attributed to infection.

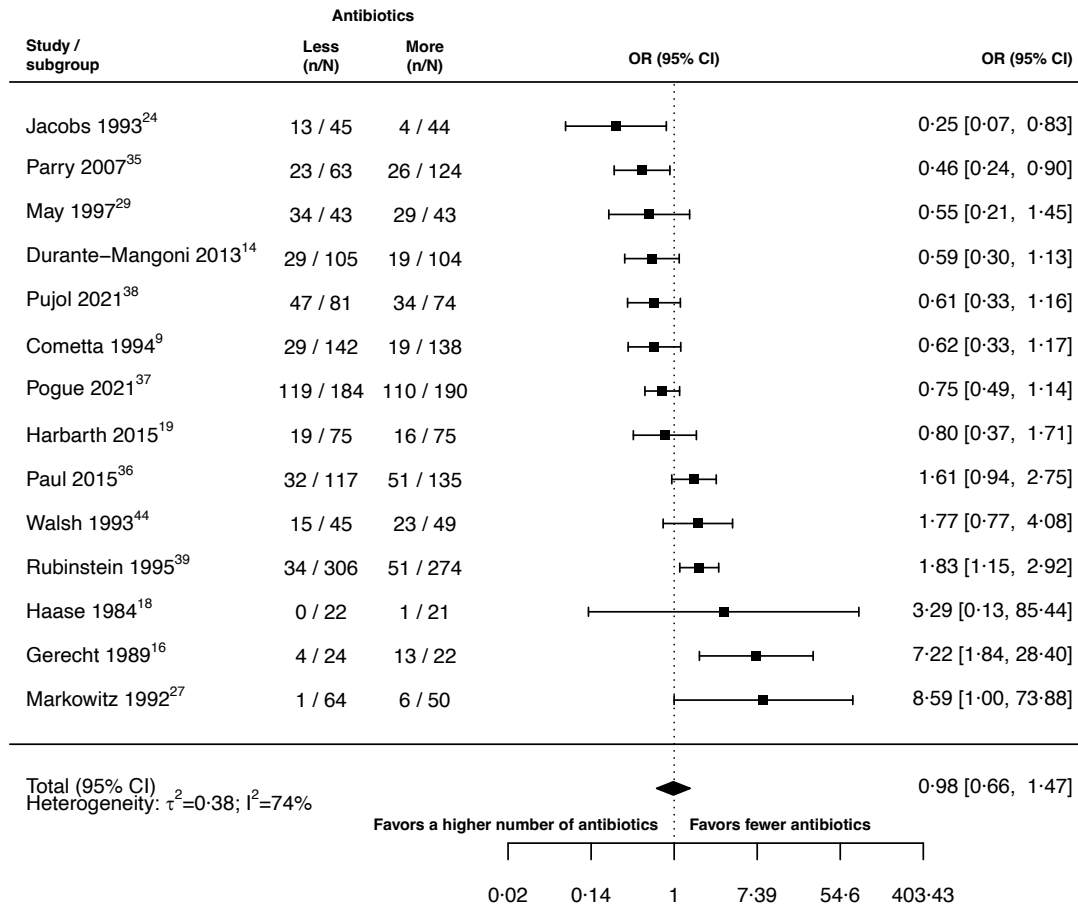

605

606 **Fig. S10.** Forest plot of treatment failure.

607

608 **9.4. Treatment failure due to a change of resistance against the study drugs**

609 We could only extract information for treatment failure due to a change of resistance against the  
 610 study drugs from three out of the 42 studies. As one of the studies had zero-events in both  
 611 treatment arms our statistical summary estimate was only based on two studies and should  
 612 therefore be interpreted with caution. Nevertheless, as for treatment failure we did not identify a  
 613 difference of using a higher number of antibiotics in comparison to less when considering  
 614 treatment failure due to a change of resistance against the study drugs (pooled LOR 0.61, 95%  
 615 CI 0.29 – 1.28;  $I^2=1\%$ ; figure S11).

616

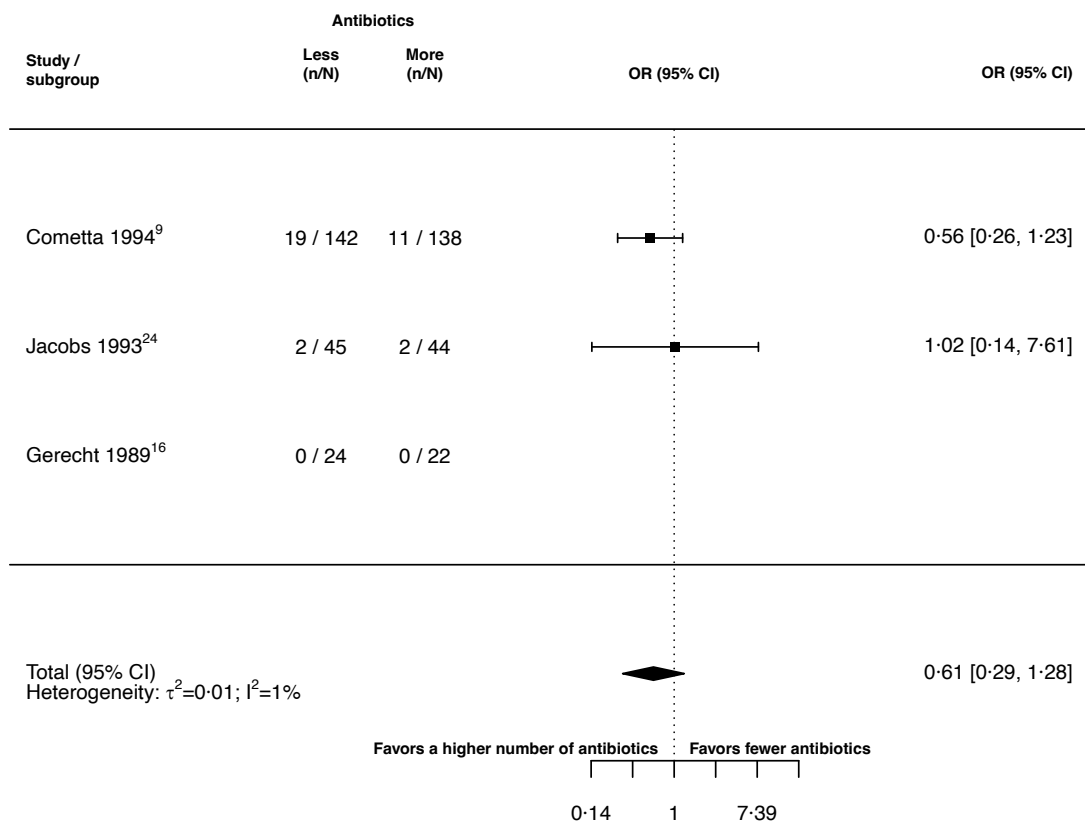

617

618 **Fig. S11.** Forest plot of treatment failure due to a change of resistance against the study drugs.

619

620 **9.5. Alterations of the prescribed treatment due to adverse events**

621 To get an indication how well the treatments were tolerated by the patients we extracted data on  
 622 alterations of the prescribed treatment due to adverse events. We did identify benefit of using a  
 623 lower number of antibiotics in comparison to a higher one. The heterogeneity in the random  
 624 effects model could be classified as unimportant (pooled OR 1.61, 95% CI 1.12 – 2.31;  $I^2=5\%$ ;  
 625 figure S12).

626

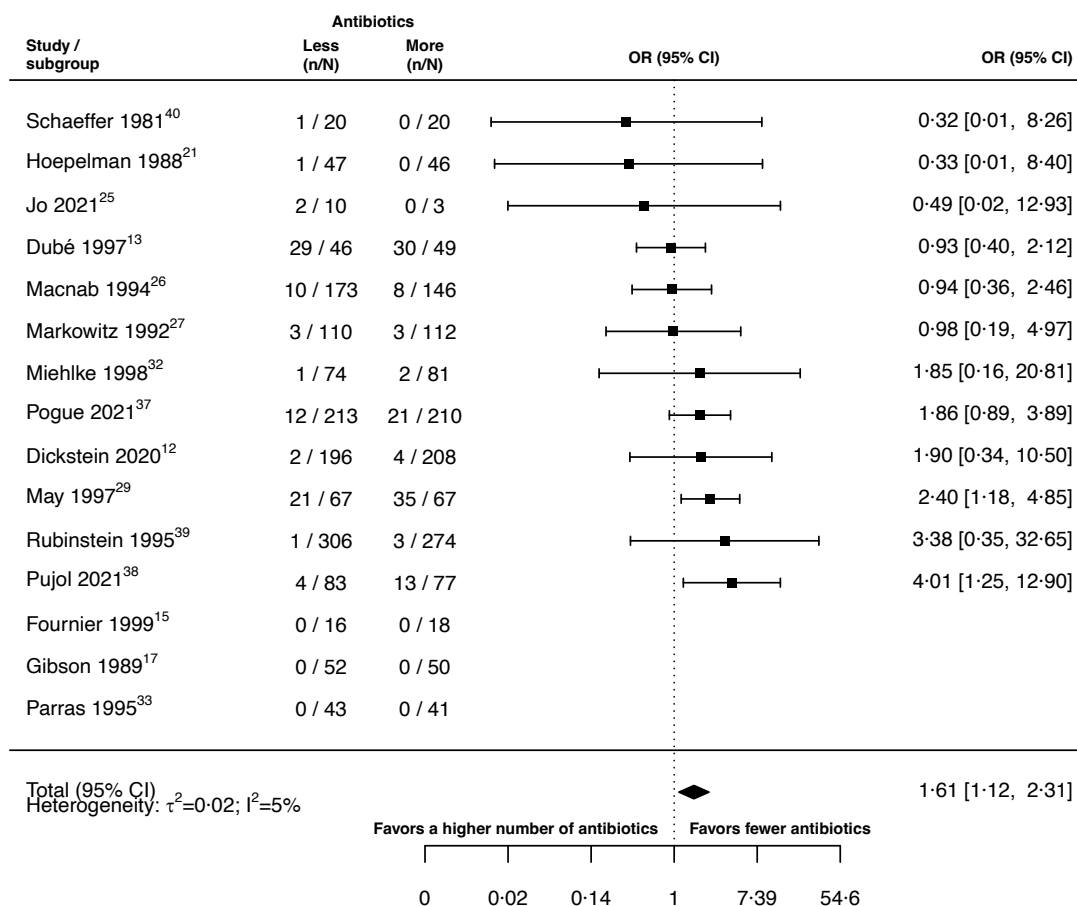

627

628 **Fig. S12.** Forest plot of alterations of the prescribed treatment due to adverse events.

629

630 **9.6. Acquisition of resistance against non-administered antibiotics**

631 There are several ways of how bacteria may get resistant against antibiotics, one of them is  
 632 through acquiring antibiotic resistance plasmids. Clinically relevant plasmids often confer  
 633 resistance against multiple antibiotics (59-61). Therefore, one might expect if a patient is treated  
 634 with a higher number of antibiotics the chances increase to acquire multidrug resistant plasmids  
 635 that confer resistances to antibiotics that are not part of the current treatment. In addition, one  
 636 could expect, that the chances for cross resistances increase, i.e., the obtained resistance  
 637 confers resistances to several antibiotics, if a higher number of antibiotics is administered. To  
 638 check this reasoning, we extracted the data for acquisition, and *de novo* emergence of resistance  
 639 against non-administered antibiotics.

640 For seven studies we extracted the data for acquisition of resistance against non-administered  
 641 antibiotics, but we could only use three of them for our statistical analyses as the other studies  
 642 had zero events in both treatment arms. As the statistical analysis was only based on three  
 643 studies and the model showed moderate to substantial heterogeneity ( $I^2=60\%$ ) our estimate might  
 644 not be sufficient to confidently give an indication. The pooled LOR of our random effects model

645 suggested no difference in using a higher number of antibiotics in comparison to less to reduce  
 646 acquisition of resistance against non-administered drugs (OR 0.39, 95% CI 0.02 – 8.48; figure  
 647 S13).  
 648

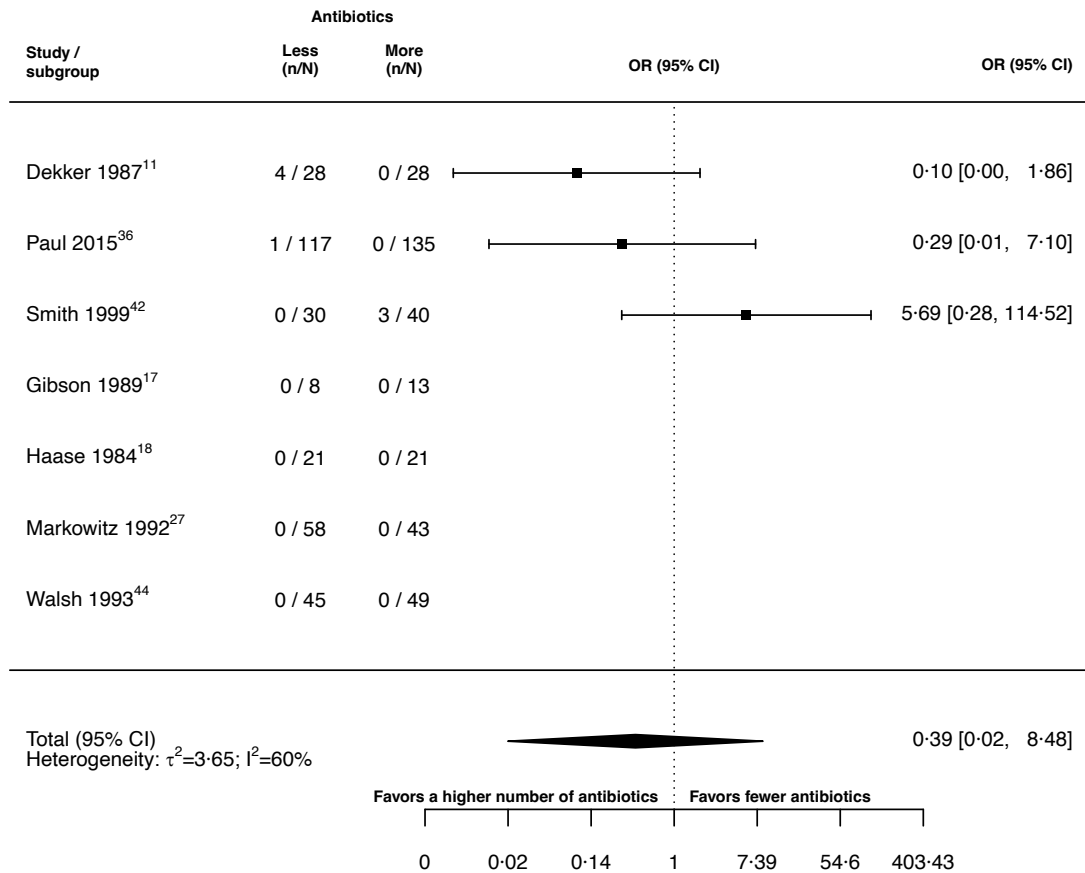

649  
 650 **Fig. S13.** Forest plot of acquisition of resistance against non-administered antibiotics.  
 651

652 **9.7. De novo emergence of resistance against non-administered antibiotics**

653 As for the main outcomes we distinguished between acquisition and *de novo* emergence of  
 654 resistance. According to our definition (main text: Methods), *de novo* emergence of resistance is  
 655 a subset of acquisition of resistance. For acquisition of resistance against non-administered  
 656 antibiotics we obtained three studies eligible for the statistical analysis, for *de novo* emergence  
 657 only two. Therefore, the estimates need to be taken with consideration. As for acquisition of  
 658 resistance against non-administered antibiotics there was no indication for a difference of using a  
 659 higher or a lower number of antibiotics (pooled OR 1.91, 95% CI 0.09 – 39.69;  $I^2=33\%$ ; figure  
 660 S14).  
 661

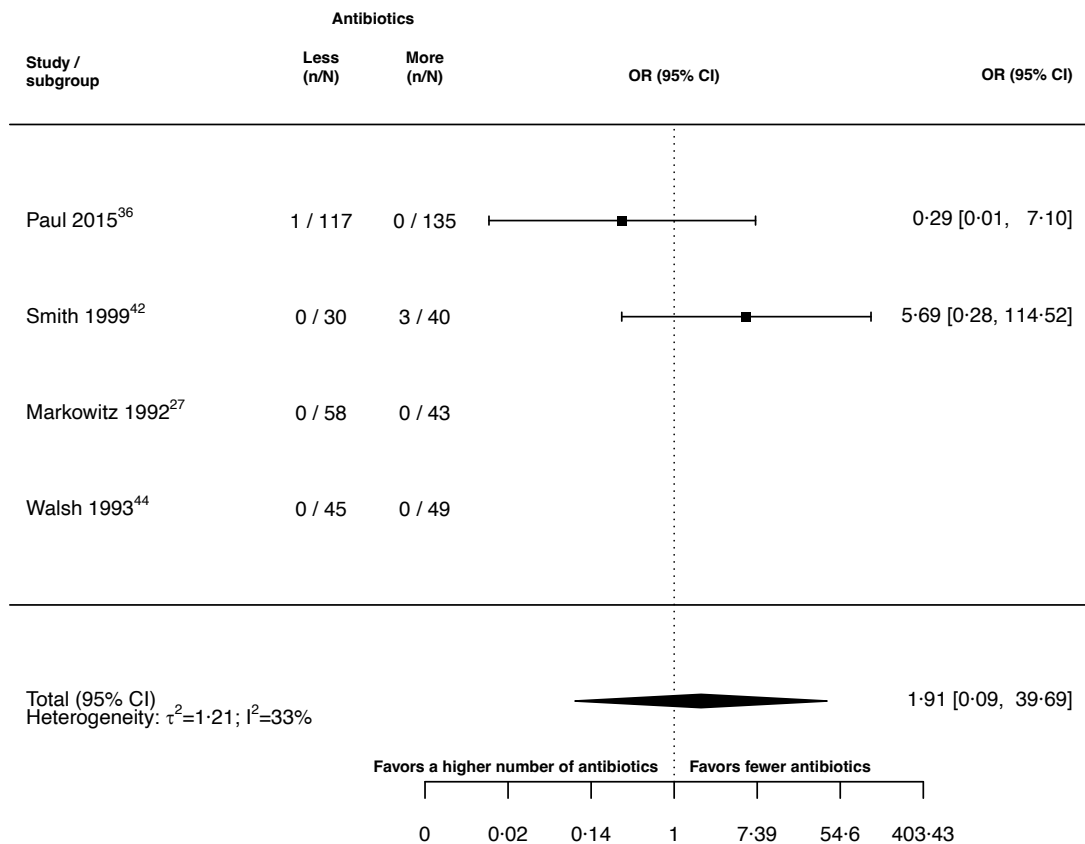

662

663 **Fig. S14.** Forest plot of *de novo* emergence of resistance against non-administered antibiotics.

664

665 **10. List of contacted authors and reasoning for exclusion of studies included in previous**  
 666 **meta-analyses**

667 An overview of authors, that were contacted for clarification of study data, is shown in table S11.

668 In our meta-analysis we excluded some studies that were included in previous meta-analyses

669 focusing on resistance development (72, 75). An overview of those studies and an exclusion

670 reason is given in table S12.

671

672 **Table S11.** List of studies for which study authors or institutions were contacted. An indication is  
 673 given whether clarifying information was obtained.

| Study            | Person/Institution contacted | Information sufficient for paper inclusion obtained (yes/no) |
|------------------|------------------------------|--------------------------------------------------------------|
| Bazolli 1998(76) | Franco Bazolli               | no                                                           |
| Benson 2000(77)  | Constance Benson             | no                                                           |

|                                                         |                                                             |     |
|---------------------------------------------------------|-------------------------------------------------------------|-----|
| Bochenek 2003(78)                                       | David Yates Graham; Wieslaw Bochenek                        | no  |
| Bosso 1988(79)                                          | John Bosso                                                  | no  |
| Bow 1987(80)                                            | Eric Bow                                                    | no  |
| Cruciani 1989(81)                                       | Mario Cruciani                                              | no  |
| Dalgic 2013 (82)                                        | Nazan Dalgic                                                | no  |
| De Pauw 1985(83)                                        | Ben de Pauw                                                 | no  |
| De Pauw 1987(84)                                        | Ben de Pauw                                                 | no  |
| Dinubile 2005(85)                                       | Mark Dinubile                                               | no  |
| East African/British medical research councils 1972(86) | Research office of the royal Brompton & Harefield hospitals | no  |
| Frank 2002(87)                                          | Elliot Frank                                                | no  |
| Gold 1985(88)                                           | Ronald Gold                                                 | no  |
| Grossman 1994(89)                                       | Ronald Grossman                                             | no  |
| Grabe 1986(90)                                          | Magnus Grabe                                                | no  |
| Guerrant 1981(91)                                       | Richard Guerrant                                            | no  |
| Heyland 2008(92)                                        | Daren Heyland                                               | no  |
| Hodson 1987(20)                                         | Margaret Hodson                                             | no  |
| Hoepelman 1988(21)                                      | Andy I.M. Hoepelman                                         | no  |
| Jackson 1986(93)                                        | Mary Anne Jackson                                           | no  |
| Liang 1990(94)                                          | Raymond Hin Suen Liang                                      | no  |
| McLaughlin 1983(95)                                     | John McLaughlin                                             | no  |
| Muder 1994(96)                                          | Robert Muder                                                | no  |
| Padoan 1987(97)                                         | Rita Padoan                                                 | no  |
| Paul 2015(36)                                           | Mical Paul                                                  | yes |
| Parry 2007(35)                                          | Christopher Parry                                           | yes |
| Pujol 2021(38)                                          | Miquel Pujol                                                | yes |
| Schaad 1997(98)                                         | Urs Schaad                                                  | no  |
| Shawky 2022(99)                                         | Sherief Bad-Elsalam                                         | no  |
| Sun 2022(100)                                           | Jia Fan                                                     | no  |

674

675  
676  
677  
678  
679

**Table S12.** Table of studies, which were included in previous meta-analyses, but excluded in our study. The reason for exclusion is indicated. \*In our protocol we stated, that we would include articles in Russian language. However, since VNK, the only Russian speaking author, did not screen all the papers from our systematic search for inclusion, we excluded studies in Russian language.

| Study               | Inclusion in previous meta-analyses | Reason for exclusion                                                                                                                    | Identified with our search strategy |
|---------------------|-------------------------------------|-----------------------------------------------------------------------------------------------------------------------------------------|-------------------------------------|
| Carbon 1987(101)    | Paul 2014(72)                       | Not accessible via ETH Zurich library services                                                                                          | no                                  |
| Cone 1985(102)      | Bliziotis 2005(75)                  | No data on resistance emergence, due to no clear statement how many resistances are measured in the treatment arm with more antibiotics | no                                  |
| Croce 1993(103)     | Bliziotis 2005(75)                  | No proper randomisation of treatment strategies, i.e., the trial was conducted in different phases                                      | yes                                 |
| Gribble 1983(104)   | Bliziotis 2005(75)                  | No fixed treatment, since antibiotics could be substituted during treatment                                                             | yes                                 |
| Iakovlev 1998(105)  | Paul 2014(72)                       | Russian language*                                                                                                                       | no                                  |
| Klatersky 1973(106) | Paul 2014(72)                       | Not clearly extractable how many patients developed resistance                                                                          | no                                  |
| Mandell 1987(107)   | Bliziotis 2005(75), Paul 2014(72)   | Treatment is not fixed due to alterations of treatment based on the infecting organism                                                  | no                                  |
| Sculier 1982(108)   | Paul 2014(72)                       | No proper comparison, since the study does not compare per se a different number of antibiotics but                                     | no                                  |

|                                                               |                                   |                                                                                                                                |    |
|---------------------------------------------------------------|-----------------------------------|--------------------------------------------------------------------------------------------------------------------------------|----|
|                                                               |                                   | adds an additional way of administration of the same antibiotic                                                                |    |
| German and Austrian Imipenem/Cilastatin study group 1992(109) | Bliziotis 2005(75), Paul 2014(72) | No fixed treatment, as an additional antibiotic was allowed to be administered only in the treatment arm with more antibiotics | no |

680

## 681 11. Search strategy

### 682 11.1. PubMed

683 (((((((((((("Bacterial Infections/Drug Therapy"[mesh]) OR "Bacterial Infections/drug effects"[Mesh])  
684 OR "Bacteria/drug effects"[Mesh]) OR "Bacteria/Drug Therapy"[mesh]) OR ((infection[tiab] OR  
685 infections[tiab]) AND bacteria\*)))))) AND (((((((((((((((("beta-Lactams/Administration and  
686 Dosage"[mesh] OR "beta- Lactams/Therapeutic Use"[mesh])) OR  
687 ("Aminoglycosides/Administration and Dosage"[mesh] OR "Aminoglycosides/Therapeutic  
688 Use"[mesh])) OR ("Chloramphenicol/Administration and Dosage"[mesh] OR  
689 "Chloramphenicol/Therapeutic Use"[mesh])) OR ("Glycopeptides/Administration and  
690 Dosage"[mesh] OR "Glycopeptides/Therapeutic Use"[mesh])) OR ("Rifamycins/Administration  
691 and Dosage"[mesh] OR "Rifamycins/Therapeutic Use"[mesh])) OR  
692 ("Streptogramins/Administration and Dosage"[mesh] OR "Streptogramins/Therapeutic  
693 Use"[mesh])) OR ("Sulfonamides/Administration and Dosage"[mesh] OR  
694 "Sulfonamides/Therapeutic Use"[mesh])) OR ("Tetracyclines/Administration and Dosage"[mesh]  
695 OR "Tetracyclines/Therapeutic Use"[mesh])) OR ("Macrolides/Administration and Dosage"[mesh]  
696 OR "Macrolides/Therapeutic Use"[mesh])) OR ("Oxazolidinones/Administration and  
697 Dosage"[mesh] OR "Oxazolidinones/Therapeutic Use"[mesh])) OR  
698 ("QUINOLONES/Administration and Dosage"[mesh] OR "QUINOLONES/Therapeutic  
699 Use"[mesh])) OR ("Lipopeptides/Administration and Dosage"[mesh] OR  
700 "Lipopeptides/Therapeutic Use"[mesh])) OR ("Anti-Bacterial Agents/Administration and  
701 Dosage"[mesh:noexp])) OR "Anti-Bacterial Agents/Therapeutic Use"[mesh:noexp]) OR "Anti-  
702 Bacterial Agents/Therapy"[mesh:noexp]) OR antibiotic\*[tiab])) AND (((((((("Drug Therapy,  
703 Combination"[mesh:noexp]) OR "drug combinations"[mesh:noexp]) OR "trimethoprim,  
704 sulfamethoxazole drug combination"[mesh:noexp]) OR "Drug Synergism"[mesh:noexp])))) OR  
705 (combination[tiab] AND (therapy[tiab] OR therapies[tiab])) OR combinationtherap\*[tiab])) AND  
706 (((("Drug Resistance, Bacterial"[Mesh]) OR "Drug Resistance, Microbial"[Mesh:noexp]) OR  
707 resistanc\*[tiab])) NOT (((("Complementary Therapies"[Mesh]) OR "Plant Extracts"[Mesh]) OR  
708 bismuth[tiab]) OR "Bismuth"[Mesh])) AND "Controlled Clinical Trial"[Publication Type]

### 709 11.2. CENTRAL

710 #1 MeSH descriptor: [Bacterial Infections] explode all trees and with qualifier(s): [drug therapy -  
711 DT]  
712 #2 MeSH descriptor: [Bacteria] explode all trees and with qualifier(s): [drug effects -  
713 #3 ((infection):ti,ab,kw OR (infections):ti,ab,kw) AND bacteria\*  
714 #4 MeSH descriptor: [beta-Lactams] explode all trees and with qualifier(s): [administration &  
715 dosage - AD,  
716 therapeutic use - TU]  
717 #5 MeSH descriptor: [Chloramphenicol] explode all trees and with qualifier(s): [administration &  
718 dosage - AD, therapeutic use - TU]  
719 #6 MeSH descriptor: [Aminoglycosides] explode all trees and with qualifier(s): [administration &  
720 dosage - AD, therapeutic use - TU]  
721 #7 MeSH descriptor: [Glycopeptides] explode all trees and with qualifier(s): [administration &  
722 dosage - AD, therapeutic use - TU]  
723 #8 MeSH descriptor: [Rifamycins] explode all trees and with qualifier(s): [administration & dosage  
724 - AD, therapeutic use - TU]  
725 #9 MeSH descriptor: [Streptogramins] explode all trees and with qualifier(s): [administration &  
726 dosage - AD, therapeutic use - TU]



727 #10 MeSH descriptor: [Sulfonamides] explode all trees and with qualifier(s): [administration &  
728 dosage - AD, therapeutic use - TU]  
729 #11 MeSH descriptor: [Macrolides] explode all trees and with qualifier(s): [administration &  
730 dosage - AD, therapeutic use - TU]  
731 #12 MeSH descriptor: [Tetracyclines] explode all trees and with qualifier(s): [administration &  
732 dosage - AD, therapeutic use - TU]  
733 #13 MeSH descriptor: [Oxazolidinones] explode all trees and with qualifier(s): [administration &  
734 dosage - AD, therapeutic use - TU]  
735 #14 MeSH descriptor: [Quinolones] explode all trees and with qualifier(s): [administration &  
736 dosage - AD, therapeutic use - TU]  
737 #15 MeSH descriptor: [Lipopeptides] explode all trees and with qualifier(s): [administration &  
738 dosage - AD, therapeutic use - TU]  
739 #16 MeSH descriptor: [Anti-Bacterial Agents] this term only and with qualifier(s): [administration &  
740 dosage - AD, therapeutic use - TU]  
741 #17 (antibiotic\*):ti,ab,kw  
742 #18 MeSH descriptor: [Drug Therapy, Combination] this term only  
743 #19 MeSH descriptor: [Drug Combinations] this term only  
744 #20 MeSH descriptor: [Trimethoprim, Sulfamethoxazole Drug Combination] this term only  
745 #21 MeSH descriptor: [Drug Synergism] this term only  
746 #22 ((combination):ti,kw,ab) NEAR/3 ((therapy):ti,kw,ab OR (therapies):ti,ab,kw)  
747 #23 (combinationtherap\*):ti,ab,kw  
748 #24 MeSH descriptor: [Drug Resistance, Bacterial] explode all trees  
749 #25 MeSH descriptor: [Drug Resistance, Microbial] this term only  
750 #26 (resistan\*):ti,ab,kw  
751 #27 MeSH descriptor: [Complementary Therapies] explode all trees  
752 #28 MeSH descriptor: [Plant Extracts] explode all trees  
753 #29 (bismuth):ti,ab,kw  
754 #30 MeSH descriptor: [Bismuth] explode all trees  
755 #31 {OR # 1-# 3}  
756 #32 {OR # 4-#17}  
757 #33 {OR #18-#23}  
758 #34 {OR #24-#26}  
759 #35 {AND #31-#34}  
760 #36 {OR # 27-#30}  
761 #37 #35 NOT #36  
762 **11.3. EMBASE**  
763 #26. #24 AND #25  
764 #25. 'controlled clinical trial'/exp  
765 #24. #23 NOT #22  
766 #23. #18 AND #19 AND #20 AND #21  
767 #22. #14 OR #15 OR #16 OR #17  
768 #21. #12 OR #13  
769 #20. #7 OR #8 OR #9 OR #10 OR #11  
770 #19. #5 OR #6  
771 #18. #1 OR #2 OR #3 OR #4  
772 #17. 'herbal medicine'/exp  
773 #16. 'alternative medicine'/exp  
774 #15. 'bismuth'/exp  
775 #14. bismuth:ti,ab,kw  
776 #13. resistan\*:ti,ab,kw  
777 #12. 'antibiotic sensitivity'/exp  
778 #11. (combination NEAR/3 (therapy OR therapies)):ti,ab,kw  
779 #10. combinationtherap\*:ti,ab,kw  
780 #9. 'antibiotic agent'/exp/dd\_cb  
781 #8. 'drug potentiation'/de  
782 #7. 'combination drug therapy'/de

- 783 #6. 'antibiotic\*':ti,ab,kw
- 784 #5. 'antibiotic agent'/exp
- 785 #4. (infection:ti,ab,kw OR infections:ti,ab,kw) AND bacteria\*
- 786 #3. 'bacterial infection'/exp
- 787 #2. 'bacterium'/exp
- 788 #1. 'prokaryotes by outer appearance'/exp
- 789

#### 790 ***11.4. Screening of eligible trials and previous meta-analyses***

791  
792 In addition to the systematic database search, we also screened the references of eligible studies  
793 and the trials included in two previous meta-analyses (72, 75). With the database search we  
794 identified 41 studies. While screening the references of those 41 studies we identified one  
795 additional study (45), which meets our inclusion criteria. This additional study was not identified in  
796 our search strategy as neither the abstract nor database specific identifiers gave any indication  
797 that resistance was measured in this study. The screening of the trials included in two previous  
798 analyses did not result in inclusion of further studies (table S12).  
799

800 **SI References**

- 801 1. Kerantzas Christopher A, Jacobs William R, Rubin Eric J, Collier RJ. Origins of  
802 Combination Therapy for Tuberculosis: Lessons for Future Antimicrobial Development  
803 and Application. *mBio*.8(2):e01586-16.
- 804 2. Fox W, Ellard GA, Mitchison DA. Studies on the treatment of tuberculosis  
805 undertaken by the British Medical Research Council tuberculosis units, 1946-1986, with  
806 relevant subsequent publications. *Int J Tuberc Lung Dis*. 1999;3(10 Suppl 2):S231-79.
- 807 3. Sterne JAC, Savović J, Page MJ, Elbers RG, Blencowe NS, Boutron I, et al. RoB  
808 2: a revised tool for assessing risk of bias in randomised trials. *BMJ*. 2019;366:l4898.
- 809 4. Paul M, Daikos GL, Durante-Mangoni E, Yahav D, Carmeli Y, Benattar YD, et  
810 al. Colistin alone versus colistin plus meropenem for treatment of severe infections  
811 caused by carbapenem-resistant Gram-negative bacteria: an open-label, randomised  
812 controlled trial. *The Lancet Infectious Diseases*. 2018;18(4):391-400.
- 813 5. Kaye Keith S, Marchaim D, Thamlikitkul V, Carmeli Y, Chiu C-H, Daikos G, et  
814 al. Colistin Monotherapy versus Combination Therapy for Carbapenem-Resistant  
815 Organisms. *NEJM Evidence*. 2022;2(1):EVIDoa2200131.
- 816 6. Bender JF, Schimpff SC, Young VM, Fortner CL, Brouillet MD, Love LJ, et al.  
817 Role of vancomycin as a component of oral nonabsorbable antibiotics for microbial  
818 suppression in leukemic patients. *Antimicrobial agents and chemotherapy*.  
819 1979;15(3):455-60.
- 820 7. Black RE, Levine MM, Clements ML, Cisneros L, Daya V. Treatment of  
821 experimentally induced enterotoxigenic *Escherichia coli* diarrhea with trimethoprim,  
822 trimethoprim-sulfamethoxazole, or placebo. *Reviews of infectious diseases*.  
823 1982;4(2):540-5.
- 824 8. Chaisson RE, Keiser P, Pierce M, Fessel WJ, Ruskin J, Lahart C, et al.  
825 Clarithromycin and ethambutol with or without clofazimine for the treatment of  
826 bacteremic *Mycobacterium avium* complex disease in patients with HIV infection. *AIDS*  
827 (london, england). 1997;11(3):311-7.
- 828 9. Cometta A, Baumgartner JD, Lew D, Zimmerli W, Pittet D, Chopart P, et al.  
829 Prospective randomized comparison of imipenem monotherapy with imipenem plus  
830 netilmicin for treatment of severe infections in nonneutropenic patients. *Antimicrobial*  
831 *agents and chemotherapy*. 1994;38(6):1309-13.
- 832 10. Dawson R, Diacon AH, Everitt D, van Niekerk C, Donald PR, Burger DA, et al.  
833 Efficiency and safety of the combination of moxifloxacin, pretomanid (PA-824), and  
834 pyrazinamide during the first 8 weeks of antituberculosis treatment: a phase 2b, open-  
835 label, partly randomised trial in patients with drug-susceptible or drug-resistant  
836 pulmonary tuberculosis. *Lancet (london, england)*. 2015;385(9979):1738-47.
- 837 11. Dekker AW, Rozenberg-Arska M, Verhoef J. Infection prophylaxis in acute  
838 leukemia: a comparison of ciprofloxacin with trimethoprim-sulfamethoxazole and  
839 colistin. *Annals of internal medicine*. 1987;106(1):7-11.
- 840 12. Dickstein Y, Lellouche J, Schwartz D, Nutman A, Rakovitsky N, Dishon Benattar  
841 Y, et al. Colistin Resistance Development Following Colistin-Meropenem Combination  
842 Therapy vs. Colistin Monotherapy in Patients with Infections Caused by Carbapenem-  
843 Resistant Organisms. *Clinical infectious diseases : an official publication of the*  
844 *Infectious Diseases Society of America*. 2019.
- 845 13. Dubé MP, Sattler FR, Torriani FJ, See D, Havlir DV, Kemper CA, et al. A  
846 randomized evaluation of ethambutol for prevention of relapse and drug resistance during

847 treatment of *Mycobacterium avium* complex bacteremia with clarithromycin-based  
848 combination therapy. *Journal of Infectious Diseases*. 1997;176(5):1225-32.

849 14. Durante-Mangoni E, Signoriello G, Andini R, Mattei A, De Cristoforo M, Murino  
850 P, et al. Colistin and rifampicin compared with colistin alone for the treatment of serious  
851 infections due to extensively drug-resistant *Acinetobacter baumannii*: a multicenter,  
852 randomized clinical trial. *Clinical infectious diseases*. 2013;57(3):349-58.

853 15. Fournier S, Burguière AM, Flahault A, Vincent V, Treilhou MP, Eliaszewicz M.  
854 Effect of adding clofazimine to combined clarithromycin-ethambutol therapy for  
855 *Mycobacterium avium* complex septicemia in AIDS patients. *European journal of clinical  
856 microbiology & infectious diseases*. 1999;18(1):16-22.

857 16. Gerecht WB, Henry NK, Hoffman WW, Muller SM, LaRusso NF, Rosenblatt JE,  
858 et al. Prospective randomized comparison of mezlocillin therapy alone with combined  
859 ampicillin and gentamicin therapy for patients with cholangitis. *Archives of internal  
860 medicine*. 1989;149(6):1279-84.

861 17. Gibson J, Date L, Joshua DE, Young GA, Wilson A, Benn R, et al. A randomised  
862 trial of empirical antibiotic therapy in febrile neutropenic patients with hematological  
863 disorders: ceftazidime versus azlocillin plus amikacin. *Australian and new zealand  
864 journal of medicine*. 1989;19(5):417-25.

865 18. Haase DA, Harding GK, Thomson MJ, Kennedy JK, Urias BA, Ronald AR.  
866 Comparative trial of norfloxacin and trimethoprim-sulfamethoxazole in the treatment of  
867 women with localized, acute, symptomatic urinary tract infections and antimicrobial  
868 effect on periurethral and fecal microflora. *Antimicrobial agents and chemotherapy*.  
869 1984;26(4):481-4.

870 19. Harbarth S, von Dach E, Pagani L, Macedo-Vinas M, Huttner B, Olearo F, et al.  
871 Randomized non-inferiority trial to compare trimethoprim/sulfamethoxazole plus  
872 rifampicin versus linezolid for the treatment of MRSA infection. *Journal of antimicrobial  
873 chemotherapy*. 2015;70(1):264-72.

874 20. Hodson ME, Roberts CM, Butland RJ, Smith MJ, Batten JC. Oral ciprofloxacin  
875 compared with conventional intravenous treatment for *Pseudomonas aeruginosa* infection  
876 in adults with cystic fibrosis. *Lancet (london, england)*. 1987;1(8527):235-7.

877 21. Hoepelman IM, Rozenberg-Arska M, Verhoef J. Comparative study of  
878 ceftriaxone monotherapy versus a combination regimen of cefuroxime plus gentamicin  
879 for treatment of serious bacterial infections: the efficacy, safety and effect on fecal flora.  
880 *Chemotherapy*. 1988;34 Suppl 1:21-9.

881 22. Hultén K, Jaup B, Stenquist B, Engstrand L. Combination treatment with  
882 ranitidine is highly efficient against *Helicobacter pylori* despite negative impact of  
883 macrolide resistance. *Helicobacter*. 1997;2(4):188-93.

884 23. Iravani A, Richard GA, Baer H, Fennell R. Comparative efficacy and safety of  
885 nalidixic acid versus trimethoprim/sulfamethoxazole in treatment of acute urinary tract  
886 infections in college-age women. *Antimicrobial agents and chemotherapy*.  
887 1981;19(4):598-604.

888 24. Jacobs RF, Vats TS, Pappa KA, Chaudhary S, Kletzel M, Becton DL.  
889 Ceftazidime versus ceftazidime plus tobramycin in febrile neutropenic children.  
890 *Infection*. 1993;21(4):223-8.

- 891 25. Jo JH, Harkins CP, Schwardt NH, Portillo JA, Zimmerman MD, Carter CL, et al.  
892 Alterations of human skin microbiome and expansion of antimicrobial resistance after  
893 systemic antibiotics. *Sci Transl Med.* 2021;13(625):eabd8077.
- 894 26. Macnab MF, Bohmer PD, Seager JR. Evaluation of the 3-drug combination,  
895 Rifater, versus 4-drug therapy in the ambulatory treatment of tuberculosis in Cape Town.  
896 *South African medical journal.* 1994;84(6):325-8.
- 897 27. Markowitz N, Quinn EL, Saravolatz LD. Trimethoprim-sulfamethoxazole  
898 compared with vancomycin for the treatment of *Staphylococcus aureus* infection. *Annals*  
899 *of internal medicine.* 1992;117(5):390-8.
- 900 28. Mavromanolakis E, Maraki S, Samonis G, Tselentis Y, Cranidis A. Effect of  
901 norfloxacin, trimethoprim-sulfamethoxazole and nitrofurantoin on fecal flora of women  
902 with recurrent urinary tract infections. *Journal of chemotherapy (florence, italy).*  
903 1997;9(3):203-7.
- 904 29. May T, Brel F, Beuscart C, Vincent V, Perronne C, Doco-Lecompte T, et al.  
905 Comparison of combination therapy regimens for treatment of human immunodeficiency  
906 virus-infected patients with disseminated bacteremia due to *Mycobacterium avium*.  
907 ANRS Trial 033 Curavium Group. Agence Nationale de Recherche sur le Sida. *Clinical*  
908 *infectious diseases.* 1997;25(3):621-9.
- 909 30. McCarty JM, Tilden SJ, Black P, Craft JC, Blumer J, Waring W, et al.  
910 Comparison of piperacillin alone versus piperacillin plus tobramycin for treatment of  
911 respiratory infections in children with cystic fibrosis. *Pediatric pulmonology.*  
912 1988;4(4):201-4.
- 913 31. Menon R, Roberts FE, Barr KW, Howard H, Lord VL, Hegarty MA, et al.  
914 Comparison of a slow-release trimethoprim with co-trimoxazole: efficacy and selection  
915 of resistance in the Enterobacteriaceae. *Journal of antimicrobial chemotherapy.*  
916 1986;18(3):415-20.
- 917 32. Miehke S, Meining A, Lehn N, Höchter W, Weingart J, Simon T, et al.  
918 Comparison of omeprazole, metronidazole and clarithromycin with  
919 omeprazole/amoxicillin dual-therapy for the cure of *Helicobacter pylori* infection.  
920 *Digestion.* 1998;59(6):646-50.
- 921 33. Parras F, Guerrero MC, Bouza E, Blázquez MJ, Moreno S, Menarguez MC, et al.  
922 Comparative study of mupirocin and oral co-trimoxazole plus topical fusidic acid in  
923 eradication of nasal carriage of methicillin-resistant *Staphylococcus aureus*.  
924 *Antimicrobial agents and chemotherapy.* 1995;39(1):175-9.
- 925 34. Parry MF, Neu HC, Merlino M, Gaerlan PF, Ores CN, Denning CR. Treatment of  
926 pulmonary infections in patients with cystic fibrosis: a comparative study of ticarcillin  
927 and gentamicin. *J Pediatr.* 1977;90(1):144-8.
- 928 35. Parry CM, Ho VA, Phuong le T, Bay PV, Lanh MN, Tung le T, et al.  
929 Randomized controlled comparison of ofloxacin, azithromycin, and an ofloxacin-  
930 azithromycin combination for treatment of multidrug-resistant and nalidixic acid-resistant  
931 typhoid fever. *Antimicrobial agents and chemotherapy.* 2007;51(3):819-25.
- 932 36. Paul M, Bishara J, Yahav D, Goldberg E, Neuberger A, Ghanem-Zoubi N, et al.  
933 Trimethoprim-sulfamethoxazole versus vancomycin for severe infections caused by  
934 methicillin resistant *Staphylococcus aureus*: randomised controlled trial. *BMJ (clinical*  
935 *research ed).* 2015;350:h2219.

936 37. Pogue JM, Rybak MJ, Stamper K, Marchaim D, Thamlikitkul V, Carmeli Y, et al.  
937 Emergence of Colistin Resistance in the OVERCOME Trial: Impact of Combination  
938 Therapy with Meropenem. *Open Forum Infectious Diseases*. 2021;8(SUPPL 1):S418-S9.  
939 38. Pujol M, Miró JM, Shaw E, Aguado JM, San-Juan R, Puig-Asensio M, et al.  
940 Daptomycin Plus Fosfomycin Versus Daptomycin Alone for Methicillin-resistant  
941 *Staphylococcus aureus* Bacteremia and Endocarditis: A Randomized Clinical Trial. *Clin*  
942 *Infect Dis*. 2021;72(9):1517-25.  
943 39. Rubinstein E, Lode H, Grassi C, Castelo A, Ward K, Alanko K, et al. Ceftazidime  
944 monotherapy vs. Ceftriaxone/tobramycin for serious hospital- acquired gram-negative  
945 infections. *Clinical Infectious Diseases*. 1995;20(5):1217-28.  
946 40. Schaeffer AJ, Flynn S, Jones J. Comparison of cinoxacin and trimethoprim-  
947 sulfamethoxazole in the treatment of urinary tract infections. *Journal of urology*.  
948 1981;125(6):825-7.  
949 41. Schaeffer AJ, Sisney GA. Efficacy of norfloxacin in urinary tract infection  
950 biological effects on vaginal and fecal flora. *Journal of urology*. 1985;133(4):628-30.  
951 42. Smith AL, Doershuk C, Goldmann D, Gore E, Hilman B, Marks M, et al.  
952 Comparison of a  $\beta$ -lactam alone versus  $\beta$ -lactam and an aminoglycoside for pulmonary  
953 exacerbation in cystic fibrosis. *Journal of Pediatrics*. 1999;134(4):413-21.  
954 43. Stack WA, Knifton A, Thirlwell D, Cockayne A, Jenkins D, Hawkey CJ, et al.  
955 Safety and efficacy of rabeprazole in combination with four antibiotic regimens for the  
956 eradication of *Helicobacter pylori* in patients with chronic gastritis with or without peptic  
957 ulceration. *American journal of gastroenterology*. 1998;93(10):1909-13.  
958 44. Walsh TJ, Standiford HC, Reboli AC, John JF, Mulligan ME, Ribner BS, et al.  
959 Randomized double-blinded trial of rifampin with either novobiocin or trimethoprim-  
960 sulfamethoxazole against methicillin-resistant *Staphylococcus aureus* colonization:  
961 prevention of antimicrobial resistance and effect of host factors on outcome.  
962 *Antimicrobial agents and chemotherapy*. 1993;37(6):1334-42.  
963 45. Winston DJ, Ho WG, Nakao SL, Gale RP, Champlin RE. Norfloxacin versus  
964 vancomycin/polymyxin for prevention of infections in granulocytopenic patients. *Am J*  
965 *Med*. 1986;80(5):884-90.  
966 46. Winston DJ, Ho WG, Bruckner DA, Gale RP, Champlin RE. Ofloxacin versus  
967 vancomycin/polymyxin for prevention of infections in granulocytopenic patients.  
968 *American journal of medicine*. 1990;88(1):36-42.  
969 47. Wurzer H, Rodrigo L, Stamler D, Archambault A, Rokkas T, Skandalis N, et al.  
970 Short-course therapy with amoxicillin-clarithromycin triple therapy for 10 days (ACT-  
971 10) eradicates *Helicobacter pylori* and heals duodenal ulcer. ACT-10 Study Group.  
972 *Alimentary pharmacology & therapeutics*. 1997;11(5):943-52.  
973 48. Jackson D, Law M, Stijnen T, Viechtbauer W, White IR. A comparison of seven  
974 random-effects models for meta-analyses that estimate the summary odds ratio. *Stat Med*.  
975 2018;37(7):1059-85.  
976 49. Viechtbauer W. Conducting Meta-Analyses in R with the metafor Package.  
977 *Journal of Statistical Software*. 2010;36(3):1 - 48.  
978 50. Günhan BK, Röver C, Friede T. Random-effects meta-analysis of few studies  
979 involving rare events. *Research Synthesis Methods*. 2020;11(1):74-90.  
980 51. Harbord RM, Egger M, Sterne JAC. A modified test for small-study effects in  
981 meta-analyses of controlled trials with binary endpoints. *Stat Med*. 2006;25(20):3443-57.

982 52. Mitchison DA, Selkon JB. Bacteriological aspects of a survey of the incidence of  
983 drug-resistant tubercle bacilli among untreated patients. *Tubercle*. 1957;38(2):85-98.

984 53. Fox W, Wiener A, Mitchison DA, Selkon JB, Sutherland I. The prevalence of  
985 drug-resistant tubercle bacilli in untreated patients with pulmonary tuberculosis: A  
986 national survey, 1955–56. *Tubercle*. 1957;38(2):71-84.

987 54. Handel A, Margolis E, Levin BR. Exploring the role of the immune response in  
988 preventing antibiotic resistance. *J Theor Biol*. 2009;256(4):655-62.

989 55. Exner M, Bhattacharya S, Christiansen B, Gebel J, Goroncy-Bermes P,  
990 Hartemann P, et al. Antibiotic resistance: What is so special about multidrug-resistant  
991 Gram-negative bacteria? *GMS Hyg Infect Control*. 2017;12:Doc05.

992 56. Cacace E, Kim V, Varik V, Knopp M, Tietgen M, Brauer-Nikonow A, et al.  
993 Systematic analysis of drug combinations against Gram-positive bacteria. *Nature*  
994 *Microbiology*. 2023;8(11):2196-212.

995 57. Vrancianu CO, Popa LI, Bleotu C, Chifiriuc MC. Targeting Plasmids to Limit  
996 Acquisition and Transmission of Antimicrobial Resistance. *Frontiers in Microbiology*.  
997 2020;11.

998 58. Goessweiner-Mohr N, Arends K, Keller W, Grohmann E, Tolmasky Marcelo E,  
999 Alonso Juan C. Conjugation in Gram-Positive Bacteria. *Microbiology Spectrum*.  
1000 2014;2(4):2.4.19.

1001 59. Cazares A, Moore MP, Hall JPJ, Wright LL, Grimes M, Emond-Rhéault J-G, et  
1002 al. A megaplasmid family driving dissemination of multidrug resistance in *Pseudomonas*.  
1003 *Nature Communications*. 2020;11(1):1370.

1004 60. Holt KE, Phan MD, Baker S, Duy PT, Nga TVT, Nair S, et al. Emergence of a  
1005 Globally Dominant IncHI1 Plasmid Type Associated with Multiple Drug Resistant  
1006 Typhoid. *PLOS Neglected Tropical Diseases*. 2011;5(7):e1245.

1007 61. Paterson DL, Bonomo RA. Extended-spectrum beta-lactamases: a clinical update.  
1008 *Clin Microbiol Rev*. 2005;18(4):657-86.

1009 62. Wishart DS, Feunang YD, Guo AC, Lo EJ, Marcu A, Grant JR, et al. DrugBank  
1010 5.0: a major update to the DrugBank database for 2018. *Nucleic Acids Res*.  
1011 2018;46(D1):D1074-d82.

1012 63. Ursu O, Holmes J, Bologna CG, Yang JJ, Mathias SL, Stathias V, et al.  
1013 DrugCentral 2018: an update. *Nucleic Acids Research*. 2019;47(D1):D963-D70.

1014 64. McCarthy K, Avent M. Oral or intravenous antibiotics? *Aust Prescr*.  
1015 2020;43(2):45-8.

1016 65. Bartoń K. MuMIn: Multi-Model Inference. 2020.

1017 66. Burnham KP, Anderson DR. Model selection and multimodel inference : a  
1018 practical information-theoretic approach. Second edition. ed. New York, New York:  
1019 Springer; 2002.

1020 67. Symonds MRE, Moussalli A. A brief guide to model selection, multimodel  
1021 inference and model averaging in behavioural ecology using Akaike’s information  
1022 criterion. *Behavioral Ecology and Sociobiology*. 2011;65(1):13-21.

1023 68. Anderson DR. Model Based Inference in the Life Sciences : A Primer on  
1024 Evidence. 1st ed. 2008. ed. New York, NY: Springer New York; 2008.

1025 69. Kang H. Trial sequential analysis: novel approach for meta-analysis. *Anesth Pain*  
1026 *Med (Seoul)*. 2021;16(2):138-50.

- 1027 70. Wetterslev J, Jakobsen JC, Gluud C. Trial sequential analysis in systematic  
1028 reviews with meta-analysis. *BMC medical research methodology*. 2017;17(1):1-18.
- 1029 71. Tamma Pranita D, Cosgrove Sara E, Maragakis Lisa L. Combination Therapy for  
1030 Treatment of Infections with Gram-Negative Bacteria. *Clinical Microbiology Reviews*.  
1031 2012;25(3):450-70.
- 1032 72. Paul M, Lador A, Grozinsky-Glasberg S, Leibovici L. Beta lactam antibiotic  
1033 monotherapy versus beta lactam-aminoglycoside antibiotic combination therapy for  
1034 sepsis. *Cochrane Database of Systematic Reviews*. 2014(1).
- 1035 73. Ye C, Wang C, Li Z, Li X, Pan J, Liu L, et al. The Effect of Combination Therapy  
1036 on Mortality and Adverse Events in Patients with Staphylococcus aureus Bacteraemia: A  
1037 Systematic Review and Meta-analysis of Randomized Controlled Trials. *Infectious  
1038 Diseases and Therapy*. 2021;10(4):2643-60.
- 1039 74. Schmid A, Wolfensberger A, Nemeth J, Schreiber PW, Sax H, Kuster SP.  
1040 Monotherapy versus combination therapy for multidrug-resistant Gram-negative  
1041 infections: Systematic Review and Meta-Analysis. *Scientific Reports*. 2019;9(1):15290.
- 1042 75. Bliziotis IA, Samonis G, Vardakas KZ, Chrysanthopoulou S, Falagas ME. Effect  
1043 of Aminoglycoside and  $\beta$ -Lactam Combination Therapy versus  $\beta$ -Lactam Monotherapy  
1044 on the Emergence of Antimicrobial Resistance: A Meta-analysis of Randomized,  
1045 Controlled Trials. *Clinical Infectious Diseases*. 2005;41(2):149-58.
- 1046 76. Bazzoli F, Zagari M, Pozzato P, Varoli O, Fossi S, Ricciardiello L, et al.  
1047 Evaluation of short-term low-dose triple therapy for the eradication of Helicobacter  
1048 pylori by factorial design in a randomized, double-blind, controlled study. *Aliment  
1049 Pharmacol Ther*. 1998;12(5):439-45.
- 1050 77. Benson CA, Williams PL, Cohn DL, Becker S, Hojczyk P, Nevin T, et al.  
1051 Clarithromycin or rifabutin alone or in combination for primary prophylaxis of  
1052 Mycobacterium avium complex disease in patients with AIDS: A randomized, double-  
1053 blind, placebo-controlled trial. The AIDS Clinical Trials Group 196/Terry Beinr  
1054 Community Programs for Clinical Research on AIDS 009 Protocol Team. *J Infect Dis*.  
1055 2000;181(4):1289-97.
- 1056 78. Bochenek WJ, Peters S, Fraga PD, Wang W, Mack ME, Osato MS, et al.  
1057 Eradication of Helicobacter pylori by 7-Day Triple-Therapy Regimens Combining  
1058 Pantoprazole with Clarithromycin, Metronidazole, or Amoxicillin in Patients with Peptic  
1059 Ulcer Disease: Results of Two Double-Blind, Randomized Studies. *Helicobacter*.  
1060 2003;8(6):626-42.
- 1061 79. Bosso JA, Black PG. Controlled trial of aztreonam vs. tobramycin and azlocillin  
1062 for acute pulmonary exacerbations of cystic fibrosis. *Pediatr Infect Dis J*. 1988;7(3):171-  
1063 6.
- 1064 80. Bow EJ, Rayner E, Scott BA, Louie TJ. Selective gut decontamination with  
1065 nalidixic acid or trimethoprim-sulfamethoxazole for infection prophylaxis in neutropenic  
1066 cancer patients: relationship of efficacy to antimicrobial spectrum and timing of  
1067 administration. *Antimicrob Agents Chemother*. 1987;31(4):551-7.
- 1068 81. Cruciani M, Concia E, Navarra A, Perversi L, Bonetti F, Aricò M, et al.  
1069 Prophylactic co-trimoxazole versus norfloxacin in neutropenic children — perspective  
1070 randomized study. *Infection*. 1989;17(2):65-9.
- 1071 82. Dalgic N, Karadag CA, Bayraktar B, Sancar M, Kara O, Pelit S, et al. Ertapenem  
1072 versus standard triple antibiotic therapy for the treatment of perforated appendicitis in



1073 pediatric patients: a prospective randomized trial. *Zeitschrift fur Kinderchirurgie [Surgery*  
1074 *in infancy and childhood]*. 2014;24(5):410-8.

1075 83. de Pauw B, Williams K, de Neeff J, Bothof T, de Witte T, Holdrinet R, et al. A  
1076 randomized prospective study of ceftazidime versus ceftazidime plus flucloxacillin in the  
1077 empiric treatment of febrile episodes in severely neutropenic patients. *Antimicrob Agents*  
1078 *Chemother.* 1985;28(6):824-8.

1079 84. de Pauw BE. [Results of several different controlled studies with ceftazidime in  
1080 the treatment of infections in immunosuppressed patients]. *Infection.* 1987;15 Suppl  
1081 4:S168-72.

1082 85. Dinubile MJ, Friedland I, Chan CY, Motyl MR, Giezek H, Shivaprakash M, et al.  
1083 Bowel colonization with resistant gram-negative bacilli after antimicrobial therapy of  
1084 intra-abdominal infections: observations from two randomized comparative clinical trials  
1085 of ertapenem therapy. *Eur J Clin Microbiol Infect Dis.* 2005;24(7):443-9.

1086 86. CONTROLLED CLINICAL TRIAL OF SHORT-COURSE (6-MONTH)  
1087 REGIMENS OF CHEMOTHERAPY FOR TREATMENT OF PULMONARY  
1088 TUBERCULOSIS: EAST AFRICAN/BRITISH MEDICAL RESEARCH COUNCILS.  
1089 *The Lancet.* 1972;299(7760):1079-85.

1090 87. Frank E, Liu J, Kinasewitz G, Moran GJ, Oross MP, Olson WH, et al. A  
1091 multicenter, open-label, randomized comparison of levofloxacin and azithromycin plus  
1092 ceftriaxone in hospitalized adults with moderate to severe community-acquired  
1093 pneumonia. *Clin Ther.* 2002;24(8):1292-308.

1094 88. Gold R, Overmeyer A, Knie B, Fleming PC, Levison H. Controlled trial of  
1095 ceftazidime vs. ticarcillin and tobramycin in the treatment of acute respiratory  
1096 exacerbations in patients with cystic fibrosis. *Pediatr Infect Dis.* 1985;4(2):172-7.

1097 89. Grossman RF, Beaupre A, LaForge J, Lampron N, Hanna K. A prospective  
1098 randomised parallel single-blind comparison of oral ciprofloxacin with oral  
1099 cotrimoxazole in the treatment of respiratory tract infections in patients with chronic  
1100 obstructive lung disease. *Drug Investigation.* 1994;8(2):110-7.

1101 90. Grabe M, Forsgren A, Hellsten S. The effectiveness of a short perioperative  
1102 course with pivampicillin/pivmecillinam in transurethral prostatic resection: clinical  
1103 results. *Scand J Infect Dis.* 1986;18(6):567-73.

1104 91. Guerrant RL, Wood SJ, Krongaard L, Reid RA, Hodge RH. Resistance among  
1105 fecal flora of patients taking sulfamethoxazole-trimethoprim or trimethoprim alone.  
1106 *Antimicrob Agents Chemother.* 1981;19(1):33-8.

1107 92. Heyland DK, Dodek P, Muscedere J, Day A, Cook D. Randomized trial of  
1108 combination versus monotherapy for the empiric treatment of suspected ventilator-  
1109 associated pneumonia. *Crit Care Med.* 2008;36(3):737-44.

1110 93. Jackson MA, Kusmiesz H, Shelton S, Prestidge C, Kramer RI, Nelson JD.  
1111 Comparison of piperacillin vs. ticarcillin plus tobramycin in the treatment of acute  
1112 pulmonary exacerbations of cystic fibrosis. *Pediatr Infect Dis.* 1986;5(4):440-3.

1113 94. Liang RH, Yung RW, Chan TK, Chau PY, Lam WK, So SY, et al. Ofloxacin  
1114 versus co-trimoxazole for prevention of infection in neutropenic patients following  
1115 cytotoxic chemotherapy. *Antimicrob Agents Chemother.* 1990;34(2):215-8.

1116 95. McLaughlin FJ, Matthews WJ, Jr., Strieder DJ, Sullivan B, Goldmann DA.  
1117 Randomized, double-blind evaluation of azlocillin for the treatment of pulmonary  
1118 exacerbations of cystic fibrosis. *J Antimicrob Chemother.* 1983;11 Suppl B:195-203.

- 1119 96. Muder RR, Boldin M, Brennen C, Hsieh M, Vickers RM, Mitchum K, et al. A  
1120 controlled trial of rifampicin, minocycline, and rifampicin plus minocycline for  
1121 eradication of methicillin-resistant *Staphylococcus aureus* in long-term care patients. *J*  
1122 *Antimicrob Chemother.* 1994;34(1):189-90.
- 1123 97. Padoan R, Cambisano W, Costantini D, Crossignani RM, Danza ML, Trezzi G, et  
1124 al. Ceftazidime monotherapy vs. combined therapy in *Pseudomonas* pulmonary  
1125 infections in cystic fibrosis. *Pediatr Infect Dis J.* 1987;6(7):648-53.
- 1126 98. Schaad UB, Wedgwood J, Ruedeberg A, Kraemer R, Hampel B. Ciprofloxacin as  
1127 antipseudomonal treatment in patients with cystic fibrosis. *Pediatr Infect Dis J.*  
1128 1997;16(1):106-11; discussion 23-6.
- 1129 99. Shawky D, Salamah AM, Abd-Elsalam SM, Habba E, Elnaggar MH, Elsayy AA,  
1130 et al. Nitazoxanide-based therapeutic regimen as a novel treatment for *Helicobacter*  
1131 *pylori* infection in children and adolescents: a randomized trial. *Eur Rev Med Pharmacol*  
1132 *Sci.* 2022;26(9):3132-7.
- 1133 100. Sun Y, Fan J, Chen G, Chen X, Du X, Wang Y, et al. A phase III, multicenter,  
1134 double-blind, randomized clinical trial to evaluate the efficacy and safety of  
1135 ceftolozane/tazobactam plus metronidazole versus meropenem in Chinese participants  
1136 with complicated intra-abdominal infections. *International Journal of Infectious Diseases.*  
1137 2022;123:157-65.
- 1138 101. Carbon C, Auboyer C, Becq-Giraudon B, Bertrand P, Gallais H, Mouton Y, et al.  
1139 Cefotaxime (C) vs cefotaxime + amikacin (C + A) in the treatment of septicemia due to  
1140 enterobacteria: a multicenter study. *Chemioterapia.* 1987;6(2 Suppl):367-8.
- 1141 102. Cone LA, Woodard DR, Stoltzman DS, Byrd RG. Ceftazidime versus  
1142 tobramycin-ticarcillin in the treatment of pneumonia and bacteremia. *Antimicrob Agents*  
1143 *Chemother.* 1985;28(1):33-6.
- 1144 103. Croce MA, Fabian TC, Stewart RM, Pritchard FE, Minard G, Trentham L, et al.  
1145 Empiric monotherapy versus combination therapy of nosocomial pneumonia in trauma  
1146 patients. *J Trauma.* 1993;35(2):303-9; discussion 9-11.
- 1147 104. Gribble MJ, Chow AW, Naiman SC, Smith JA, Bowie WR, Sacks SL, et al.  
1148 Prospective randomized trial of piperacillin monotherapy versus carboxypenicillin-  
1149 aminoglycoside combination regimens in the empirical treatment of serious bacterial  
1150 infections. *Antimicrob Agents Chemother.* 1983;24(3):388-93.
- 1151 105. Iakovlev SV, Iakovlev VP, Derevianko, II, Kira EF. [Multicenter open  
1152 randomized trial of meropenem in comparison to ceftazidime and amikacin used in  
1153 combination in severe hospital infections]. *Antibiot Khimioter.* 1998;43(1):15-23.
- 1154 106. Klastersky J, Cappel R, Daneau D. Therapy with carbenicillin and gentamicin for  
1155 patients with cancer and severe infections caused by gram-negative rods. *Cancer.*  
1156 1973;31(2):331-6.
- 1157 107. Mandell LA, Nicolle LE, Ronald AR, Landis SJ, Duperval R, Harding GK, et al.  
1158 A prospective randomized trial of ceftazidime versus cefazolin/tobramycin in the  
1159 treatment of hospitalized patients with pneumonia. *J Antimicrob Chemother.*  
1160 1987;20(1):95-107.
- 1161 108. Sculier JP, Coppens L, Klastersky J. Effectiveness of mezlocillin and  
1162 endotracheally administered sisomicin with or without parenteral sisomicin in the  
1163 treatment of Gram-negative bronchopneumonia. *J Antimicrob Chemother.* 1982;9(1):63-  
1164 8.

1165 109. Randomized multicenter clinical trial with imipenem/cilastatin versus  
1166 cefotaxime/gentamicin in the treatment of patients with non-life-threatening infections.  
1167 German and Austrian Imipenem/Cilastatin Study Group. *Eur J Clin Microbiol Infect Dis.*  
1168 1992;11(8):683-92.  
1169
